1 **Deep serum proteomics reveal biomarkers and causal candidates for type 2**  
2 **diabetes**

3

4 Valborg Gudmundsdottir<sup>1,2\*</sup>, Valur Emilsson<sup>2,3</sup>, Thor Aspelund<sup>2,1</sup>, Marjan Ilkov<sup>2</sup>, Elias F  
5 Gudmundsson<sup>2</sup>, Nuno R Zilhão<sup>2</sup>, John R Lamb<sup>4</sup>, Lori L Jennings<sup>5</sup> and Vilmundur  
6 Gudnason<sup>2,1,\*</sup>

7

8 <sup>1</sup>Faculty of Medicine, University of Iceland, Reykjavik, Iceland.

9 <sup>2</sup>Icelandic Heart Association, Holtasmari 1, IS-201 Kopavogur, Iceland.

10 <sup>3</sup>Faculty of Pharmaceutical Sciences, University of Iceland, Reykjavik, Iceland.

11 <sup>4</sup>GNF Novartis, 10675 John Jay Hopkins Drive, San Diego, CA 92121, USA.

12 <sup>5</sup>Novartis Institutes for Biomedical Research, 22 Windsor Street, Cambridge, MA 02139,  
13 USA.

14

15 \*Corresponding authors. Email: [valborg@hjarta.is](mailto:valborg@hjarta.is), [v.gudnason@hjarta.is](mailto:v.gudnason@hjarta.is)

16 <sup>†</sup>These authors contributed equally to this work

17

## 18 **Abstract**

19 The prevalence of type 2 diabetes mellitus (T2DM) is expected to increase rapidly in the next  
20 decades, posing a major challenge to societies worldwide. The emerging era of precision  
21 medicine calls for the discovery of biomarkers of clinical value for prediction of disease  
22 onset, where causal biomarkers can furthermore provide actionable targets. Blood-based  
23 factors like serum proteins are in contact with every organ in the body to mediate global  
24 homeostasis and may thus directly regulate complex processes such as aging and the  
25 development of common chronic diseases. We applied a data-driven proteomics approach  
26 measuring serum levels of 4,137 proteins in 5,438 Icelanders to discover novel biomarkers for  
27 incident T2DM and describe the serum protein profile of prevalent T2DM. We identified 536  
28 proteins associated with incident or prevalent T2DM. Through LASSO penalized logistic  
29 regression analysis combined with bootstrap resampling, a panel of 20 protein biomarkers that  
30 accurately predicted incident T2DM was identified with a significant incremental  
31 improvement over traditional risk factors. Finally, a Mendelian randomization analysis  
32 provided support for a causal role of 48 proteins in the development of T2DM, which could  
33 be of particular interest as novel therapeutic targets.

34

## 35 **Introduction**

36 Type 2 diabetes mellitus (T2DM) is a progressive disease characterized by decreasing  
37 sensitivity of peripheral tissues to plasma insulin accompanied by compensatory  
38 hyperinsulinemia, and a gradual failure of the pancreatic islet  $\beta$ -cells to maintain glucose  
39 homeostasis. The worldwide prevalence of diabetes is projected to increase from 451 million  
40 in 2017 to 693 million by 2045<sup>1</sup>. In the past decade, the use of data-driven omics technologies  
41 has led to a significant advancement in the discovery of new biomarkers for complex disease.  
42 More than 240 genetic loci have been associated with T2DM<sup>2-6</sup> and recent efforts utilizing  
43 genome-wide polygenic risk scores have shown a promising ability to predict those at risk of  
44 developing the disease<sup>6,7</sup>. Blood-based biomarker candidates with prognostic value for T2D  
45 have begun to emerge, such as the branched-chain amino acids (BCAAs) and other  
46 metabolites<sup>8,9</sup>. However, only fragmentary data are available for protein biomarkers for  
47 prediction of incident T2DM<sup>10</sup>. In fact, robust molecular biomarkers are yet to be established  
48 that add a clinically useful predictive value over glycemia markers such as fasting glucose and  
49 HbA1c<sup>10</sup>. Thus, identification of novel biomarkers for T2DM is crucial for early and  
50 improved risk assessment of the disease beyond what can be achieved through the use of  
51 conventional measures of glycemia and adiposity.

52 Proteins are the key functional units of biology and disease, however, high throughput  
53 detection and quantification of serum proteins in a large human population has been hampered  
54 by the limitations of available proteomic profiling technologies. The Slow-Off rate Modified  
55 Aptamer (SOMAmer) based technology has emerged as a powerful proteomic profiling  
56 platform in terms of sensitivity, dynamic range of detection and multiplex capacity<sup>11-13</sup>. A  
57 custom-designed SOMAscan platform was recently developed to measure 5,034 protein  
58 analytes in a single serum sample, of which 4,782 SOMAmers bind specifically to 4,137  
59 distinct human proteins<sup>14</sup>. We applied this platform to 5,457 subjects of the Age,

60 Gene/Environment Susceptibility (AGES)-Reykjavik study, a prospective study of deeply  
61 phenotyped subjects over 65 years of age<sup>14,15</sup>. In the present study we demonstrate the  
62 identification of novel serum protein biomarkers for incident and prevalent T2DM through  
63 logistic regression and LASSO penalized logistic regression analysis combined with bootstrap  
64 resampling. Finally, by applying a Mendelian Randomization (MR) analysis, we identify a  
65 subset of those proteins that may be causally related to T2DM.

66

## 67 **Results**

68 The baseline characteristics of the population-based AGES-Reykjavik cohort participants with  
69 complete data for the current study (n = 5,438) are shown in **Table S1** and an overview of the  
70 cohort and study workflow is shown in **Fig. S1**. The full cohort with baseline measurements  
71 included 654 prevalent T2DM cases and 4,784 individuals free of T2DM. Out of 2,940  
72 individuals without diabetes at baseline who participated in the 5-year AGESII follow-up visit  
73 (Methods), 112 developed T2DM within the period based on self-report, medication and/or  
74 fasting glucose measurement. As an internal validation cohort for incident T2DM, we  
75 considered the 1,844 AGES participants who were non-diabetic at baseline but did not  
76 participate in the AGESII 5-year follow-up visit, for whom we defined incident T2DM from  
77 prescription and medical records only (see Methods), resulting in 46 cases within up to a 12.8  
78 years follow-period. As expected, both prevalent and incident T2DM cases differed markedly  
79 from individuals free of diabetes in terms of metabolic phenotypes at baseline (**Table S1**).

80

### 81 *Serum protein profile of prevalent T2DM*

82 To first describe the serum protein profile associated with prevalent T2DM, we compared 654  
83 prevalent T2DM cases to 4,784 non-diabetic individuals. Using a logistic regression adjusted

84 for age and sex, we identified 520 unique proteins that were significantly associated with  
85 prevalent T2DM after Bonferroni correction for multiple hypothesis testing ( $P_{\text{adj}} < 0.05$ ), with  
86 the strongest associations observed for ARFIP2, MXRA8 and CPM (**Fig. 1a, Table S2**). In a  
87 second model including adjustment for body mass index (BMI), 322 proteins remained  
88 statistically significant (**Table S2**). Many of the proteins were inter-correlated, with pairwise  
89 Pearson's  $r$  ranging from -0.60 to 0.97 (**Fig. S2a**). A pathway and gene ontology (GO)  
90 enrichment analysis of all 520 proteins associated with prevalent T2DM revealed an  
91 enrichment of proteins involved in extracellular matrix (ECM)-receptor interaction,  
92 complement and coagulation cascades, metabolic processes and extracellular region (**Fig.**  
93 **S3a, Table S3**). We furthermore found the genes encoding the 520 prevalent T2DM-  
94 associated proteins to be enriched for high expression in liver, followed by other tissues that  
95 included kidney, gastrointestinal tract and pancreas (**Fig. S4a**). Thus, the diabetic state is  
96 reflected in a major shift in the serum proteome that is involved in metabolic, inflammatory  
97 and ECM processes.

98

### 99 *Serum protein profile of incident T2DM*

100 The serum protein profiles of T2DM patients observed in the cross-sectional analysis  
101 described above may represent shifts that occurred either before or after the onset of the  
102 disease. To identify serum protein signatures that preceded the onset of T2DM, we next  
103 focused our analysis on the 2,940 non-diabetic AGES participants who participated in a  
104 second study visit (AGESII) 5-years after the baseline visit, of which 112 developed T2DM  
105 within the follow-up period. In a logistic regression analysis adjusted for age and sex, we  
106 identified 99 unique proteins significantly associated with incident T2DM after Bonferroni  
107 correction for multiple hypothesis testing with the strongest associations observed for  
108 IGFBP2, APOM and INHBC (**Fig. 1b, Table S4**). After further adjustment for BMI, 24

109 proteins remained statistically significant ( $P_{\text{adj}} < 0.05$ ) (**Table S4**). Once again we observed  
110 extensive correlations between many of the serum proteins, with pairwise Pearson's  $r$  ranging  
111 from -0.55 to 0.97 (**Fig. S2b**). The majority (84/99 proteins or 85%) of proteins associated  
112 with incident T2DM were also associated with prevalent T2DM (**Fig. 1c**), an overlap that was  
113 highly significant (Fisher's exact test  $P = 7.2 \times 10^{-63}$ ), and the direction of effect was generally  
114 consistent (Spearman's correlation coefficient = 0.82, **Fig. 1d-f**). The proteins associated with  
115 incident T2DM included proteins with an established role in T2DM (IGFBP2, adiponectin  
116 and insulin), proteins encoded by genes reported as T2DM GWAS loci<sup>6</sup> (ATP1B2, PTPRS)  
117 and various apolipoproteins (APOM, APOF, APOA5). Functional enrichment analysis of the  
118 full set of 99 proteins associated with incident T2DM revealed a significant enrichment for  
119 numerous GO terms related to metabolism, lipid transport and response to insulin while  
120 enriched pathways included leptin signaling and adipogenesis (**Fig. S3b, Table S3**). Tissue  
121 expression enrichment analysis revealed a strong enrichment for genes expressed in liver,  
122 followed by adipose tissue (**Fig. S4b**). Thus, the functional annotation of the serum proteins  
123 associated with incident T2DM was characterized by tissue specific signatures and pathways  
124 that seem to reflect dyslipidemia and insulin resistance, which are critical in the development  
125 of T2DM. We compared our findings with previously described protein biomarker candidates  
126 for incident T2DM as previously reviewed<sup>11</sup>. Of 58 previously suggested candidates that were  
127 targeted in our study, we found 26 to be at least nominally associated ( $P < 0.05$ ) with incident  
128 T2DM in our data and additional 15 with prevalent T2DM (**Table S5**).

129

### 130 *Predictive performance of protein biomarkers for incident T2DM*

131 As it is of considerable interest to define a set of biomarkers for clinical prediction of T2DM,  
132 we aimed to define the subset of proteins associated with incident T2DM that had the best  
133 predictive value. To evaluate the power to discriminate between incident T2DM cases and

134 non-cases, we applied a receiver operating characteristic (ROC) curve to compute the area  
135 under the curve (AUC). The AUC for incident T2DM using age and sex alone was 0.56 (95%  
136 CI 0.51-0.62) and a clinical model including the Framingham-Offspring Risk Score (FORS)<sup>16</sup>  
137 components (age, sex, parental history of diabetes, BMI, systolic blood pressure, HDL,  
138 triglycerides, fasting glucose and abdominal circumference as a proxy for waist) yielded an  
139 AUC of 0.86 (95% CI 0.83-0.90). Only a single protein (REN) added significantly to the  
140 FORS model C-statistic ( $C_{\text{increase}} = 0.0055$ ,  $P = 0.041$ , **Table S4**), thus motivating a  
141 multivariate predictor analysis. For this purpose, a least absolute shrinkage and selection  
142 operator (LASSO) logistic regression model combined with bootstrap resampling was fitted  
143 using incident T2DM as outcome and age, sex, and the full set of 4,782 SOMAmers as  
144 predictors. Here, a set of 32 non-zero parameter estimates gave the highest AUC when the  
145 tuning parameter  $\log(\lambda)$  was -4.54 for incident T2DM (**Fig. S5**). To account for  
146 randomness in the selection process, model performance and improved variable selection, the  
147 LASSO was bootstrapped 1,000 times through resampling. The proteins were rank-ordered  
148 with respect to how often they were selected during the bootstrap resampling and for the  
149 strength of association to incident T2DM in the logistic regression analysis. The top 20  
150 protein predictors among those significantly associated ( $P_{\text{adj}} < 0.05$ ) with incident T2DM in  
151 the logistic regression analysis are listed in **Table 1**. We investigated the added value of both  
152 top 10 and 20 ranked serum proteins beyond age, sex and the full FORS model. Both sets of  
153 proteins increased the predictive value significantly, where an addition of 10 and 20 proteins  
154 increased the AUC from 0.86 for the FORS model to 0.90 ( $P = 3.2 \times 10^{-3}$ ) and 0.91 ( $P =$   
155  $2.8 \times 10^{-4}$ ), respectively (**Fig. 2a-b, Table 2**). The observed increase in AUC was considerably  
156 greater than for randomly sampled sets of proteins (**Fig. 2b**). Observed and predicted  
157 proportion with incident T2DM in each risk decile of the 20 protein discrimination model are  
158 shown in **Fig. S6**.

159 To our knowledge, similar data does currently not exist in another cohort for  
160 independent replication of our findings. However, in addition to the bootstrap approach  
161 employed for internal validation, we performed a secondary validation approach using data  
162 from the 1,844 AGES-Reykjavik participants who were non-diabetic at baseline but did not  
163 participate in the AGESII 5-year follow-up visit and were thus not included in the discovery  
164 analysis for incident T2DM (**Table S1**). Using the 20 proteins chosen from the LASSO  
165 analysis (**Table 1**), the AUC for incident T2DM (as defined from prescription and medical  
166 records) was significantly increased from 0.80 for the FORS model to 0.84 ( $P = 6.6 \times 10^{-3}$ )  
167 (**Fig. S7, Table S6**) in this set of individuals.

168

#### 169 *Potentially causal associations between protein biomarkers and T2DM*

170 While it is not a requirement for clinically useful biomarkers to be causally related to disease,  
171 identifying causal disease pathways provides important insights for the development of new  
172 therapeutic strategies. We therefore performed a MR analysis<sup>17</sup> to identify proteins with a  
173 potentially causal role in the development of T2DM (**Fig. S8**). To maximize the protein  
174 coverage for this analysis, we used a subset of the AGES cohort with available genetic data ( $n$   
175 = 3,219) to select genetic instruments for the proteins of interest but note that *cis*-pQTLs  
176 identified in AGES replicated over 80% of *cis*-pQTLs reported by others<sup>14</sup>. For the genes  
177 encoding the 536 proteins associated with either incident or prevalent T2DM in our study,  
178 using a *cis*-window of 100 kb up- and downstream and including the exons and introns of the  
179 genes in question, we identified suitable genetic instruments (see Methods) for 246 proteins,  
180 of which 184 (75%) proteins had more than one independent ( $r^2 < 0.1$ ) instrument (**Table S7**).  
181 On average, we identified 5 (range 1 - 20) genetic instruments per protein (**Fig. S9**), which  
182 explained on average 6% (range 0.4% - 48%) of the variance in their respective protein levels  
183 and with a mean F-statistic of 85 (range 10 - 3014). Of note, the genetic variants regulating



184 the levels of the T2DM-associated proteins were strongly enriched within enhancer regions  
185 mapped in liver and hepatocytes from the Encode and Roadmap consortia (**Fig. S4c-d**),  
186 supporting the previously observed enrichment for liver expression of the genes encoding the  
187 T2DM-associated proteins.

188 We performed a two-sample MR analysis, integrating the genetic instruments for  
189 protein levels identified in AGES with summary statistics from the recent DIAMANTE  
190 GWAS for T2DM in 898,130 European individuals (74,124 T2DM cases and 824,006  
191 controls)<sup>6</sup>. In this analysis, 48 proteins were supported as potentially causal ( $P < 0.05$ ) for  
192 T2DM with the strongest support for MMP12, HIBCH and WFIKKN2 (**Fig. 3, Fig. S10**). Of  
193 these 48 proteins, few exhibited evidence of heterogeneity (2/36 proteins with  $>1$  instrument)  
194 or pleiotropy (1/30 proteins with  $>2$  instruments) (**Table S8**). Proteins for which multiple  
195 genetic instruments were available tended to have smaller estimated effect sizes, together with  
196 a narrower confidence interval (**Fig. 3**). Of the 48 proteins, three (WFIKKN2, INHBC and  
197 AFM) were among the 20 proteins selected for the prediction of incident T2DM in the  
198 LASSO analysis. We further tested the 48 potentially causal proteins in a one-sample MR  
199 analysis using data from 3,196 AGES participants with available genotype data ( $N_{T2DM} = 368$ ,  
200 11.5%), fitting an age and sex adjusted two-stage regression with the second stage as a  
201 logistic regression. Using this approach, we obtained additional support ( $P < 0.05$  and  
202 directionally consistent estimates) for four proteins (RBP7, IL18R1, FAM177A1, AFM) (**Fig.**  
203 **S11, Table S8**). We compared the observational and MR estimates for all 48 proteins (**Table**  
204 **S8, Fig. S12**). As expected due to a small sample size, the one-sample MR estimates were less  
205 precise than the two-sample MR estimates, as illustrated by the wider confidence intervals.  
206 We observed directional consistency between observational and two-sample MR estimates for  
207 26 out of 48 (54%) proteins (**Table S8**), which neither related to the strength of the MR  
208 associations nor the number of instruments per protein (**Fig. S13**). As an example of

209 discrepancies between observational and MR estimates, we found serum levels of MMP12 to  
210 be increased in T2DM, consistent with previous reports<sup>18</sup>, whereas the MR estimate for  
211 MMP12 suggested a protective effect for T2DM. These findings are similar to the reported  
212 protective MR estimate for MMP12 and risk of coronary heart disease<sup>19</sup> whereas clinical and  
213 experimental studies have shown higher levels of MMP12 in cardiovascular disease<sup>18,20</sup>.

214

## 215 **Discussion**

216 To our knowledge, the primary data used in the present study is the largest protein dataset  
217 generated to date in terms of number of proteins measured and human samples screened. In  
218 the literature there are few descriptions of plasma protein based biomarkers and drug targets  
219 for incident T2DM, and those available are usually limited to relatively few protein  
220 measurements<sup>21–25</sup>. In this study of a population-based sample of 5,438 elderly Icelanders, we  
221 advance the current knowledge by describing hundreds of proteins significantly associated  
222 with prevalent or incident T2DM, or both.

223         The large number of proteins significantly associated with prevalent T2DM  
224 demonstrates a major shift in the serum proteome in the diabetic state. We note that we have  
225 previously shown that the time between diagnosis and sample collection had no effect on the  
226 association of individual proteins to prevalent disease<sup>14</sup>. This proteomic shift seems to some  
227 extent be driven by inflammatory processes and ECM alterations given the observed enriched  
228 pathways. By contrast, these pathways were not enriched among proteins associated with  
229 incident T2DM, suggesting they may be secondary to the onset of the disease. Further studies  
230 of these proteomic changes are required to understand if and how they may affect downstream  
231 complications of T2DM, as diabetes-induced changes of the ECM may for example contribute  
232 to cardiovascular disease<sup>26</sup>. While we observed some proteomic changes specific to prevalent

233 T2DM, others could be observed before the onset of the disease as illustrated by a large subset  
234 of the proteins also being associated with 5-year incident T2DM in non-diabetic individuals.  
235 A BMI-adjusted model suggested that a considerable proportion of the proteins were  
236 associated with T2DM via obesity. The proteins associated with incident T2DM were mainly  
237 involved in lipid transport, metabolism and insulin response, supporting the involvement of  
238 these pathways during the preclinical stage of T2DM. Both sets of proteins associated with  
239 prevalent or incident T2DM were enriched for liver-specific gene expression compared to the  
240 full set of 4,137 serum proteins measured, consistent with the genetic variants regulating their  
241 levels being enriched in enhancers mapped in liver tissue and hepatocyte cell lines. These  
242 results underscore that the diabetic serum proteomic signatures seem to reflect processes  
243 ongoing in the liver, although other tissues also contribute to the proteomic changes related to  
244 T2DM, as demonstrated for example by the enrichment of adipose expression among proteins  
245 associated with incident T2DM.

246         A systematic review of blood-borne and urinary biomarkers for incident T2DM  
247 concluded that no single marker has been identified with a prediction value comparable to that  
248 of glycemia markers, although some can add value to the prediction<sup>10</sup>, thus highlighting a  
249 potential need for multivariate predictors. A major strength of our study is the extensive  
250 protein coverage of the applied array, making this the most comprehensive screening of serum  
251 proteins for prediction of incident T2DM to date. Through LASSO regression we identified a  
252 subset of 20 proteins that as a group added significantly to the FORS model of clinical  
253 variables for prediction of incident T2DM, both in an internal bootstrap validation setup and  
254 importantly also in a separate sample of the AGES cohort that was not used for discovery  
255 analysis. However, it should be noted that our validation sample contained few cases and  
256 different criteria were applied to define incident cases than for the discovery sample, since the  
257 validation sample did not include a fasting glucose measurement and thus did not capture

258 undiagnosed or non-medicated individuals. It may however also be considered a strength that  
259 the protein predictors still improved the prediction of incident T2DM despite these differences  
260 but we acknowledge that these efforts serve as internal validation only. Currently, similar data  
261 in other cohorts are lacking and future efforts will have to be made for replication of our  
262 findings in independent populations and across different proteomics technologies.

263         The MR analysis revealed a total of 48 proteins that may be causally related to T2DM.  
264 Among the candidate proteins with the strongest support, we found HIBCH that is a BCAA  
265 catabolic enzyme, where the MR estimate suggested an inverse causal effect between the  
266 proteins and risk of T2DM. Circulating BCAAs levels have consistently been shown to  
267 predict T2DM<sup>27</sup> although the underlying mechanisms are complex and remain to be fully  
268 understood<sup>28</sup>. Our findings support a model where higher protein expression of the BCAA  
269 catabolic pathway reduces risk of T2DM. Members of the PPAR signaling pathway (FABP4,  
270 FABP1) were also found among the causal candidate proteins for T2DM. PPARs are the  
271 target of the thiazolidinediones anti-diabetic drug class and our results suggest that other  
272 members of this pathway could be considered as therapeutic targets. In fact, FABP4 inhibitors  
273 have been proposed as novel therapeutic strategies for obesity and T2DM<sup>29</sup> and a PPARg-  
274 regulated<sup>30</sup> retinol-binding protein, RBP4, is similarly being considered as an anti-diabetic  
275 target<sup>31</sup>. Our results from both two- and one-sample MR analysis implicate another retinol-  
276 binding protein, RBP7, the expression of which is affected by PPARg ligands<sup>32</sup>, which may  
277 be an interesting novel candidate for follow-up studies.

278         Three proteins from the 20 protein predictor for incident T2DM were also supported  
279 as causal by the MR analysis; afamin (AFM), inhibin  $\beta_C$  (INHBC) and WFIKKN2. Afamin  
280 has been associated with both prevalent and incident T2DM in a large-scale pooled study of  
281 eight prospective cohorts<sup>33</sup> and we here obtain support from both two- and one-sample MR  
282 analyses for it to play a causal role in the disease. Less is known about the function of the

283 other two proteins; inhibin  $\beta_C$  is one of the inhibin/activin hormones and is highly expressed  
284 in liver whereas WFIKKN2 is known to bind GDF8/11 proteins with high affinity<sup>34</sup>, both of  
285 which have been implicated in diabetes<sup>35,36</sup>. We and others have shown that genetic variants  
286 in the *WFIKKN2* region regulate serum GDF8/11 levels in *trans* via WFIKKN2 protein  
287 levels<sup>14,19</sup> and previously noted a correlation between WFIKKN2 and GDF8/11 serum  
288 levels<sup>14</sup>, however in the current study we did not find a significant association between  
289 GDF8/11 and T2DM so additional studies are required to understand the mechanisms by  
290 which WFIKKN2 may affect risk of T2DM.

291 The availability of both exposure and outcome data in our dataset provided the  
292 opportunity to compare causal estimates from the two-sample MR analysis and the  
293 observational estimate. In many cases we found these estimates to disagree. Inconsistent  
294 directionality between causal and observational estimates has been noted for particular serum  
295 proteins, such as for MMP12 and the risk of coronary heart disease<sup>19</sup>, for which we find a  
296 similar inconsistency with regard to T2DM. Further work will be required to understand the  
297 underlying causes of these inconsistent estimates, which indicate a complex relationship  
298 between genetics, protein mediators and disease.

299 To conclude, our results demonstrate a major shift in the serum proteome before and  
300 during the diabetic stage. The many signals observed in our study suggest that there is  
301 potential for developing clinically useful serum protein panels for T2DM risk prediction that  
302 can add information over traditional risk factors, thus promoting early diagnosis and improved  
303 prognosis of those at risk of developing the disease. Furthermore, proteins supported as  
304 potentially causal in our data could be of particular interest as novel therapeutic targets.

305

306

## 307 **Methods**

### 308 **Study population**

309 Cohort participants aged 66 through 96 were included from the AGES – Reykjavik Study<sup>15</sup>, a  
310 single-center prospective population-based study of deeply phenotyped subjects (n = 5,457).  
311 After excluding individuals without a fasting glucose measurement or with established type 1  
312 diabetes, 5,438 individuals remained for analysis in the current study (mean age 76.6 ± 5.6  
313 years). All AGES study cohort members were European Caucasians. Blood samples were  
314 collected at the AGES baseline visit after an overnight fast, serum was prepared using a  
315 standardized protocol and stored in 0.5 ml aliquots at -80°C. T2DM was determined from  
316 self-reported diabetes, diabetes medication use or fasting plasma glucose  $\geq 7$  mmol/L  
317 according to the American Diabetes Association guidelines<sup>37</sup>. Of the 4,784 AGES participants  
318 free of T2DM at first visit in AGES, 2,940 attended a 5-year follow-up visit (AGESII). Those  
319 with manifest T2DM at the five years follow-up visit were classified as incident T2DM cases,  
320 using same criteria as for the baseline visit. For the remaining 1,844 individuals who did not  
321 attend the AGESII follow-up visit, we used linked medical and prescription records and  
322 defined incident T2DM as having a registered ICD10 code starting with ‘E11’ or an ATC  
323 prescription code starting with ‘A10’ at any given time after the AGES baseline visit.  
324 Prescription records were obtained from a centralized database of drug prescriptions from the  
325 Directorate of Health in Iceland. Lipids, fasting glucose and HbA1c levels were measured on  
326 a Roche Hitachi 912 instrument, with reagents from Roche Diagnostics. Fasting insulin levels  
327 were measured on a Roche Elecsys 2010 instrument with an electrochemiluminescence  
328 immunoassay, using two monoclonal antibodies and a sandwich principle. The first IRP  
329 WHO Reference Standard 66/304 (NIBSC) was used to standardize the method. BMI was  
330 calculated as weight/(height)<sup>2</sup>. Abdominal circumference was measured in cm and used as a  
331 proxy for waist circumference in the FORS<sup>16</sup> clinical model, as waist circumference was not

332 measured at the AGES baseline visit. Parental history of diabetes was obtained from  
333 questionnaires administered at the baseline AGES visit.

334 The AGES-Reykjavik study was approved by the National Bioethics Committee in  
335 Iceland (approval number VSN-00-063), the National Institute on Aging Intramural  
336 Institutional Review Board (US), and the Data Protection Authority in Iceland. Informed  
337 consent was obtained from all study participants.

### 338 **Protein profiling platform**

339 Each protein has its own detection reagent selected from chemically modified DNA libraries,  
340 referred to as Slow Off-rate Modified Aptamers (SOMAmers)<sup>38</sup>. We designed an expanded  
341 custom version of the SOMApanel platform to include proteins known or predicted to be  
342 found in the extracellular milieu, including the predicted extracellular domains of single- and  
343 certain multi-pass transmembrane proteins as previously described<sup>14</sup>. The new aptamer-based  
344 platform measures 5,034 protein analytes in a single serum sample, of which 4,782  
345 SOMAmers bind specifically to 4,137 human proteins (some proteins are detected by more  
346 than one SOMAmer) and 250 SOMAmers that recognize non-human targets (47 non-human  
347 vertebrate proteins and 203 targeting human pathogens). Serum levels of 4,137 human  
348 proteins were determined at SomaLogic Inc. (Boulder, US) in distinct samples from 5,457  
349 individuals essentially as previously described<sup>12,14</sup>. We note that albumin-tolerance testing is a  
350 part of standard assay development at SomaLogic and has been evaluated for all analytes on  
351 the new custom-designed aptamer-based platform, showing no effect of albumin addition on  
352 the SOMAmer-protein interactions. To avoid batch or time of processing biases, both sample  
353 collection and sample processing for protein measurements were randomized and all samples  
354 run as a single set. The 5,034 SOMAmers that passed quality control had median intra-assay  
355 and inter-assay coefficient of variation,  $CV = 100 \times f/\mu$ ,  $<5\%$ , or similar to that reported on  
356 variability in the SOMAscan assays<sup>38</sup>. Finally, in addition to multiple types of inferential

357 support for SOMAmer specificity towards target proteins including cross-platform validation  
358 and detection of the many *cis*-acting effects<sup>14</sup>, a direct measures of the SOMAmer specificity  
359 for 779 of the SOMAmers in complex biological samples was performed using tandem mass  
360 spectrometry<sup>14</sup>. Hybridization controls were used to correct for systematic variability in  
361 detection and calibrator samples of three dilution sets (40%, 1% and 0.005%) were included  
362 so that the degree of fluorescence was a quantitative reflection of protein concentration.

### 363 **Genotyping and imputation**

364 For the MR analysis, we included 3,219 AGES participants for whom genetic data was  
365 available. Genotyping was performed using the Illumina 370CNV BeadChip array and  
366 genotype calling was performed using the Illumina Bead Studio. Samples were excluded  
367 based on sample failure, genotype mismatch with reference panel and sex mismatch on  
368 genotypes<sup>39</sup>. Imputation (1000 Genomes Phase 3 v5 reference panel) was performed using  
369 MaCH (version 1.0.16), and the following QC filtering was applied at the variant level: call  
370 rate (<97%), Hardy Weinberg Equilibrium ( $p < 1 \times 10^{-6}$ , PLINK mishap haplotype-based test  
371 for non-random missing genotype data ( $p < 1 \times 10^{-9}$ ), and mismatched positions between  
372 Illumina, dbSNP and/or HapMap.

### 373 **Statistical analysis**

374 Prior to the analysis of the protein measurements, we applied a Yeo-Johnson transformation  
375 on the protein data to improve normality, symmetry and to maintain all protein variables on a  
376 similar scale<sup>40 35</sup>. Logistic regression was run for all 4,782 SOMAmers targeting 4,137 human  
377 proteins for incident or prevalent T2DM as outcome, with age and sex included as covariates,  
378 and an additional model including BMI. Associations with P-value below a Bonferroni  
379 corrected threshold ( $P < 0.05/4,782 = 1.1 \times 10^{-5}$ ) were considered significant. When more than  
380 one SOMAmer was available for the same protein, the one with the lowest P-value in the age



381 and sex adjusted model was retained for all downstream analyses. Functional enrichment  
382 analysis for selected sets of proteins were performed using g:Profiler<sup>41</sup>, using the full set of  
383 human proteins targeted by the SOMApanel as background and a significance threshold of  
384 Benjamini-Hochberg FDR < 0.05. Tissue-specific gene expression enrichment analysis was  
385 performed using the TissueEnrich R package<sup>42</sup>.

386 For establishing a multivariate protein predictor for incident T2DM, we ran a Least  
387 Absolute Shrinkage and Selection Operator (LASSO) (L1-regularized regression) logistic  
388 regression model, with incident T2DM as outcome and age, sex, and proteins as predictors,  
389 using the glmnet R package for LASSO regression<sup>43</sup>. The LASSO solution is found by  
390 maximizing the diagnostic capacity of the predictors (the area under the curve or AUC) with  
391 constraints on the parameter estimates. With the LASSO approach most of the regression  
392 parameter estimates are set to zero. The constraint is chosen via cross-validation which  
393 introduces some randomness into the solution process. To account for the randomness in the  
394 selection process and to reduce chance of overfitting, the whole process was bootstrapped  
395 1,000 times. The proteins selected for the final 10 and 20 protein predictors were chosen from  
396 those significantly associated with incident T2DM in the original logistic regression analysis,  
397 but ranked by the number of times they were chosen in the LASSO bootstrap analysis.

398 We assessed discrimination or differentiation between T2DM cases and non-cases  
399 through the receiver operating characteristic (ROC) curve, which is a graph of the true  
400 positive rate versus the false positive rate for each classification rule derived from a prediction  
401 model<sup>44</sup>. To quantify the predictive value of the selected set of proteins, the area under the  
402 ROC curve (AUC) was estimated. The AUC can be interpreted as the probability that a  
403 patient with the outcome is given a higher probability of the outcome by the model than a  
404 randomly chosen patient without the outcome<sup>44</sup>. ROC curves were compared with a paired  
405 two-sided DeLong's test for two correlated ROC curves using the pROC package in R<sup>45</sup>.

406 For the MR analysis we identified genetic instruments as follows. For each protein,  
407 SNPs within a *cis* window of 100 kb up- or downstream of the respective protein-encoding  
408 gene (and including the gene in question) were tested for an association with protein levels in  
409 a linear regression model adjusted for age and sex assuming an additive genetic model. SNPs  
410 were included as genetic instruments if the association with protein levels was window-wide  
411 significant ( $P < 0.05/\text{number of SNPs in the given window}$ , similar to what was previously  
412 described<sup>14</sup>) and the F-statistic  $\geq 10$ . Finally, the genetic instruments per protein were filtered  
413 to only include independent signals ( $r^2 > 0.1$ ,  $> 500$  kb apart), identified using the `clump_data`  
414 command in the TwoSampleMR R package<sup>46</sup> where linkage disequilibrium is calculated  
415 between the provided SNPs using European samples from the 1000 Genomes project and only  
416 the SNP with the lowest P-value retained among those in LD. We investigated cell-type  
417 specific enhancer enrichment of the genetic instruments compared to established GWAS loci  
418 through HaploReg v4.1<sup>47</sup> using the SNP with the lowest association P-value per protein.

419 The two-sample MR analysis was performed using the “TwoSampleMR” R package<sup>46</sup>,  
420 using DIAMANTE GWAS summary statistics for T2DM without adjustment for BMI in  
421 European individuals<sup>6</sup> as outcome. The inverse variance weighted method was used for the  
422 MR analysis unless only one genetic instrument was available, in which case the Wald ratio  
423 was used. A Cochran’s Q test (‘`mr_heterogeneity`’ function in the TwoSampleMR package)  
424 was used to evaluate heterogeneity of instruments and MR Egger regression  
425 (‘`mr_pleiotropy_test`’ function in the TwoSampleMR package) performed for indication of  
426 horizontal pleiotropy. For the one-sample MR analysis we performed a two-stage  
427 instrumental variable regression, with the second stage as a logistic regression, where a  
428 weighted genetic risk score was used as an instrumental variable when more than one genetic  
429 instrument was available for a given protein.

430

431 **Data availability**

432 The custom-design Novartis SOMAscan is available through a collaboration agreement with  
433 the Novartis Institutes for BioMedical Research ([lori.jennings@novartis.com](mailto:lori.jennings@novartis.com)). Data from the  
434 AGES Reykjavik study are available through collaboration ([AGES\\_data\\_request@hjarta.is](mailto:AGES_data_request@hjarta.is))  
435 under a data usage agreement with the IHA. All data supporting the conclusions of the paper  
436 are presented in the main text and supplementary materials.

437

438

## 439 References

- 440 1. Cho, N. H. *et al.* IDF Diabetes Atlas: Global estimates of diabetes prevalence for 2017  
441 and projections for 2045. *Diabetes Res. Clin. Pract.* **138**, 271–281 (2018).
- 442 2. Morris, A. P. *et al.* Large-scale association analysis provides insights into the genetic  
443 architecture and pathophysiology of type 2 diabetes. *Nat. Genet.* **44**, 981–990 (2012).
- 444 3. Mahajan, A. *et al.* Genome-wide trans-ancestry meta-analysis provides insight into the  
445 genetic architecture of type 2 diabetes susceptibility. *Nat. Genet.* **46**, 234–44 (2014).
- 446 4. Fuchsberger, C. *et al.* The genetic architecture of type 2 diabetes. *Nature* **536**, 41–7  
447 (2016).
- 448 5. Scott, R. A. *et al.* An Expanded Genome-Wide Association Study of Type 2 Diabetes  
449 in Europeans. *Diabetes* 147–148 (2017). doi:10.2337/db16-1253
- 450 6. Mahajan, A. *et al.* Fine-mapping type 2 diabetes loci to single-variant resolution using  
451 high-density imputation and islet-specific epigenome maps. *Nat. Genet.* **50**, 1505–1513  
452 (2018).
- 453 7. Khera, A. V. *et al.* Genome-wide polygenic scores for common diseases identify  
454 individuals with risk equivalent to monogenic mutations. *Nat. Genet.* (2018).  
455 doi:10.1038/s41588-018-0183-z
- 456 8. Roberts, L. D., Koulman, A. & Griffin, J. L. Towards metabolic biomarkers of insulin  
457 resistance and type 2 diabetes: Progress from the metabolome. *Lancet Diabetes*  
458 *Endocrinol.* **2**, 65–75 (2014).
- 459 9. Merino, J. *et al.* Metabolomics insights into early type 2 diabetes pathogenesis and  
460 detection in individuals with normal fasting glucose. *Diabetologia* **61**, 1315–1324  
461 (2018).
- 462 10. Abbasi, A. *et al.* A systematic review of biomarkers and risk of incident type 2  
463 diabetes: An overview of epidemiological, prediction and aetiological research  
464 literature. *PLoS One* **11**, (2016).
- 465 11. Davies, D. R. *et al.* Unique motifs and hydrophobic interactions shape the binding of  
466 modified DNA ligands to protein targets. *Proc. Natl. Acad. Sci.* **109**, 19971–19976  
467 (2012).
- 468 12. Hathout, Y. *et al.* Large-scale serum protein biomarker discovery in Duchenne  
469 muscular dystrophy. *Proc. Natl. Acad. Sci.* **112**, 7153–7158 (2015).
- 470 13. Gold, L. *et al.* Aptamer-Based Multiplexed Proteomic Technology for Biomarker  
471 Discovery. *PLoS One* **5**, e15004 (2010).
- 472 14. Emilsson, V. *et al.* Co-regulatory networks of human serum proteins link genetics to  
473 disease. *Science (80-. )*. **1327**, 1–12 (2018).
- 474 15. Harris, T. B. *et al.* Age, gene/environment susceptibility-Reykjavik study:  
475 Multidisciplinary applied phenomics. *Am. J. Epidemiol.* **165**, 1076–1087 (2007).
- 476 16. Wilson, P. W. F. *et al.* Prediction of incident diabetes mellitus in middle-aged adults:

- 477 The Framingham Offspring Study. *Arch. Intern. Med.* **167**, 1068–1074 (2007).
- 478 17. Smith, G. D. & Hemani, G. Mendelian randomization: Genetic anchors for causal  
479 inference in epidemiological studies. *Hum. Mol. Genet.* **23**, 89–98 (2014).
- 480 18. Goncalves, I. *et al.* Elevated plasma levels of MMP-12 are associated with  
481 atherosclerotic burden and symptomatic cardiovascular disease in subjects with type 2  
482 diabetes. *Arterioscler. Thromb. Vasc. Biol.* **35**, 1723–1731 (2015).
- 483 19. Sun, B. B. *et al.* Genomic atlas of the human plasma proteome. *Nature* **558**, 73–79  
484 (2018).
- 485 20. Mahdessian, H. *et al.* Integrative studies implicate matrix metalloproteinase-12 as a  
486 culprit gene for large-artery atherosclerotic stroke. *J. Intern. Med.* **282**, 429–444  
487 (2017).
- 488 21. Nowak, C. *et al.* Protein biomarkers for insulin resistance and type 2 diabetes risk in  
489 two large community cohorts. *Diabetes* **65**, 276–284 (2016).
- 490 22. Raynor, L. A. *et al.* Novel risk factors and the prediction of type 2 diabetes in the  
491 Atherosclerosis Risk in Communities (ARIC) study. *Diabetes Care* **36**, 70–76 (2013).
- 492 23. Herder, C. *et al.* Immunological and cardiometabolic risk factors in the prediction of  
493 type 2 diabetes and coronary events: MONICA/KORA Augsburg case-cohort study.  
494 *PLoS One* **6**, (2011).
- 495 24. Chao, C. *et al.* The Lack of Utility of Circulating Biomarkers of Inflammation and  
496 Endothelial Dysfunction for Type 2 Diabetes Risk Prediction Among Postmenopausal  
497 Women. *Arch. Intern. Med.* **170**, 1557–65 (2010).
- 498 25. Salomaa, V. *et al.* Thirty-one novel biomarkers as predictors for clinically incident  
499 diabetes. *PLoS One* **5**, 1–8 (2010).
- 500 26. Law, B., Fowlkes, V., Goldsmith, J. G., Carver, W. & Goldsmith, E. C. Diabetes-  
501 induced alterations in the extracellular matrix and their impact on myocardial function.  
502 *Microsc. Microanal.* **18**, 22–34 (2012).
- 503 27. Guasch-Ferré, M. *et al.* Metabolomics in prediabetes and diabetes: A systematic review  
504 and meta-analysis. *Diabetes Care* **39**, 833–846 (2016).
- 505 28. White, P. J. & Newgard, C. B. Branched-chain amino acids in disease. *Science (80-. ).*  
506 **363**, 582–583 (2019).
- 507 29. Furuhashi, M. & Hotamisligil, G. S. Fatty acid-binding proteins: Role in metabolic  
508 diseases and potential as drug targets. *Nat. Rev. Drug Discov.* **7**, 489–503 (2008).
- 509 30. Rosell, M. *et al.* Peroxisome proliferator-activated receptors- $\alpha$  and - $\gamma$  and cAMP-  
510 mediated pathways, control retinol-binding protein-4 gene expression in brown adipose  
511 tissue. *Endocrinology* **153**, 1162–1173 (2012).
- 512 31. Tamori, Y., Sakaue, H. & Kasuga, M. RBP4, an unexpected adipokine. *Nat. Med.* **12**,  
513 30–31 (2006).
- 514 32. Hsiao, G. *et al.* Multi-tissue, selective PPAR modulation of insulin sensitivity and  
515 metabolic pathways in obese rats. *AJP Endocrinol. Metab.* **300**, E164–E174 (2011).

- 516 33. Kollerits, B. *et al.* Plasma Concentrations of Afamin Are Associated With Prevalent  
517 and Incident Type 2 Diabetes: A Pooled Analysis in More Than 20,000 Individuals.  
518 *Diabetes Care* **40**, 1386–1393 (2017).
- 519 34. Kondás, K., Szláma, G., Trexler, M. & Patthy, L. Both WFIKKN1 and WFIKKN2  
520 have high affinity for growth and differentiation factors 8 and 11. *J. Biol. Chem.* **283**,  
521 23677–84 (2008).
- 522 35. Li, H. *et al.* GDF11 attenuates development of type 2 diabetes via improvement of islet  
523  $\beta$ -cells function and survival. *Diabetes* **66**, 1914–1927 (2017).
- 524 36. Guo, T. *et al.* Myostatin inhibition prevents diabetes and hyperphagia in a mouse  
525 model of lipodystrophy. *Diabetes* **61**, 2414–23 (2012).
- 526 37. American Diabetes Association. Diagnosis and classification of diabetes mellitus.  
527 *Diabetes Care* **37**, S81-90 (2014).
- 528 38. Candia, J. *et al.* Assessment of Variability in the SOMAscan Assay. *Sci. Rep.* **7**, 14248  
529 (2017).
- 530 39. Psaty, B. M. *et al.* Cohorts for Heart and Aging Research in Genomic Epidemiology  
531 (CHARGE) Consortium. *Circ. Cardiovasc. Genet.* **2**, 73–80 (2009).
- 532 40. Kuhn, M. & Johnson, K. *Applied Predictive Modeling*. (2013). doi:10.1007/978-1-  
533 4614-6849-3
- 534 41. Reimand, J. *et al.* g:Profiler—a web server for functional interpretation of gene lists  
535 (2016 update). *Nucleic Acids Res.* **44**, W83–W89 (2016).
- 536 42. Eden, E., Navon, R., Steinfeld, I., Lipson, D. & Yakhini, Z. GOrilla: a tool for  
537 discovery and visualization of enriched GO terms in ranked gene lists. *BMC*  
538 *Bioinformatics* **10**, 48 (2009).
- 539 43. Jain, A. & Tuteja, G. TissueEnrich: Tissue-specific gene enrichment analysis.  
540 *Bioinformatics* (2018). doi:doi: 10.1093/bioinformatics/bty890
- 541 44. Hanley, A. J. G. *et al.* Prediction of type 2 diabetes using simple measures of insulin  
542 resistance: combined results from the San Antonio Heart Study, the Mexico City  
543 Diabetes Study, and the Insulin Resistance Atherosclerosis Study. *Diabetes* **52**, 463–9  
544 (2003).
- 545 45. Robin, X. *et al.* pROC: an open-source package for R and S+ to analyze and compare  
546 ROC curves. *BMC Bioinformatics* **12**, 77 (2011).
- 547 46. Hemani, G. *et al.* The MR-Base platform supports systematic causal inference across  
548 the human phenome. *Elife* **7**, e34408 (2018).
- 549 47. Ward, L. D. & Kellis, M. HaploReg v4: Systematic mining of putative causal variants,  
550 cell types, regulators and target genes for human complex traits and disease. *Nucleic*  
551 *Acids Res.* **44**, D877–D881 (2016).

552

553 **Tables**

554 **Table 1.** The top 20 proteins predicting incident T2DM as ranked by the number of times  
 555 chosen in LASSO bootstrap analysis score in the AGES discovery sample (n = 2,940), shown  
 556 with beta-coefficient, P-values and Bonferroni-corrected P-value from the logistic regression  
 557 analysis adjusted for age and sex.

| <b>Protein<br/>(Entrez<br/>symbol)</b> | <b>beta</b> | <b>P-value</b>        | <b>P-value<sub>adj</sub></b> | <b>N times<br/>chosen in 1000<br/>bootstraps</b> |
|----------------------------------------|-------------|-----------------------|------------------------------|--------------------------------------------------|
| <b>AXIN2</b>                           | 0.46        | $3.9 \times 10^{-06}$ | $1.9 \times 10^{-02}$        | 890                                              |
| <b>SPINK9</b>                          | -0.53       | $1.8 \times 10^{-07}$ | $8.5 \times 10^{-04}$        | 878                                              |
| <b>MMRN2</b>                           | -0.46       | $2.2 \times 10^{-06}$ | $1.0 \times 10^{-02}$        | 842                                              |
| <b>ARFIP2</b>                          | -0.70       | $6.4 \times 10^{-12}$ | $3.0 \times 10^{-08}$        | 840                                              |
| <b>APOA5</b>                           | -0.62       | $6.2 \times 10^{-09}$ | $3.0 \times 10^{-05}$        | 793                                              |
| <b>REN</b>                             | 0.51        | $1.3 \times 10^{-06}$ | $6.3 \times 10^{-03}$        | 767                                              |
| <b>RET</b>                             | 0.70        | $1.4 \times 10^{-11}$ | $6.8 \times 10^{-08}$        | 684                                              |
| <b>NCAM2</b>                           | -0.58       | $7.2 \times 10^{-09}$ | $3.5 \times 10^{-05}$        | 668                                              |
| <b>IGFBP2</b>                          | -1.04       | $1.3 \times 10^{-16}$ | $6.3 \times 10^{-13}$        | 641                                              |
| <b>IMPAD1</b>                          | -0.53       | $5.2 \times 10^{-08}$ | $2.5 \times 10^{-04}$        | 489                                              |
| <b>WFIKKN2</b>                         | -0.65       | $1.6 \times 10^{-09}$ | $7.8 \times 10^{-06}$        | 488                                              |
| <b>STAT3</b>                           | 0.44        | $3.8 \times 10^{-06}$ | $1.8 \times 10^{-02}$        | 481                                              |
| <b>CCL11</b>                           | -0.44       | $9.8 \times 10^{-06}$ | $4.7 \times 10^{-02}$        | 452                                              |
| <b>EDN2</b>                            | 0.47        | $9.7 \times 10^{-07}$ | $4.6 \times 10^{-03}$        | 439                                              |
| <b>INHBC</b>                           | 0.72        | $4.5 \times 10^{-13}$ | $2.2 \times 10^{-09}$        | 439                                              |
| <b>SCO1</b>                            | -0.47       | $7.9 \times 10^{-06}$ | $3.8 \times 10^{-02}$        | 425                                              |
| <b>AFM</b>                             | 0.55        | $5.6 \times 10^{-08}$ | $2.7 \times 10^{-04}$        | 388                                              |
| <b>IDS</b>                             | -0.47       | $3.1 \times 10^{-06}$ | $1.5 \times 10^{-02}$        | 375                                              |
| <b>RAB26</b>                           | -0.45       | $3.5 \times 10^{-06}$ | $1.7 \times 10^{-02}$        | 363                                              |
| <b>CPM</b>                             | 0.55        | $4.7 \times 10^{-08}$ | $2.2 \times 10^{-04}$        | 354                                              |

558

559 **Table 2.** Receiver operating characteristic discrimination scores (AUC) based on 10 or 20 top  
 560 ranked protein predictors for incident T2DM together with baseline and the FORS clinical  
 561 model in the AGES discovery sample (n = 2,940). P-values (paired two-sided DeLong's test)  
 562 are shown for the comparison of ROC curves to either the previous model or the baseline  
 563 model.

| <b>Model</b> | <b>N proteins</b> | <b>AUC</b> | <b>Lower<br/>bound</b> | <b>Upper<br/>bound</b> | <b>P-value<br/>previous</b> | <b>P-value<br/>baseline</b> |
|--------------|-------------------|------------|------------------------|------------------------|-----------------------------|-----------------------------|
| Age, sex     | 0                 | 0.56       | 0.50                   | 0.61                   | 1                           | 1                           |
|              | 10                | 0.84       | 0.80                   | 0.88                   | $1.93 \times 10^{-20}$      | $1.93 \times 10^{-20}$      |
|              | 20                | 0.87       | 0.83                   | 0.90                   | 0.016                       | $2.63 \times 10^{-23}$      |
| FORS         | 0                 | 0.86       | 0.83                   | 0.90                   | 1                           | 1                           |
|              | 10                | 0.89       | 0.86                   | 0.93                   | $3.25 \times 10^{-03}$      | $3.25 \times 10^{-03}$      |
|              | 20                | 0.91       | 0.88                   | 0.94                   | 0.045                       | $2.83 \times 10^{-04}$      |

564

## 565 **Supplementary Table legends**

566 **Table S1.** AGES-Reykjavik cohort baseline characteristics stratified by follow-up data  
567 availability and T2DM status.

568 **Table S2.** Serum protein associations with prevalent T2DM in the AGES cohort (n = 5,438).  
569 Results are shown for logistic regression models adjusted for age and sex, or age, sex and  
570 BMI. P<sub>adj</sub>, Bonferroni corrected P-value.

571 **Table S3.** Functional enrichment results from gProfiler for proteins associated with prevalent  
572 T2DM, incident T2DM or significant in the two-sample MR analysis for T2DM, using the  
573 full SOMApanel as background. Benjamini-Hochberg adjusted P-values <0.05 are  
574 highlighted in yellow.

575 **Table S4.** Serum protein associations with incident T2DM in the AGES cohort (n = 2,940).  
576 Results are shown for logistic regression models adjusted for age and sex; age, sex and BMI  
577 or the Framingham Offspring Risk Study (FORS) clinical model for prediction of incident  
578 T2DM. For the FORS model we show the AUC for the full model, together with the AUC  
579 increase for the given protein over the FORS clinical model alone and the respective P-value  
580 comparing the two (paired two-sided DeLong's test).

581 **Table S5.** Overview of 57 published biomarker candidates for incident T2DM, together with  
582 the observed significance level of the corresponding protein measured in the current study.  
583 NS, not significant, P<sub>adj</sub>, Bonferroni adjusted P-value.

584 **Table S6.** Receiver operating characteristic discrimination scores (AUC) based on 10 or 20  
585 top ranked protein predictors for incident T2DM together with baseline and the FORS clinical  
586 risk model in the AGES validation sample (n = 1,844). P-values (paired two-sided DeLong's  
587 test) are shown for the comparison of ROC curves to either the previous model or the baseline  
588 model.

589 **Table S7.** An overview of the associations between the *cis*-SNPs used as instruments for the  
590 246 proteins that were included in the MR analysis.

591 **Table S8.** Two- and one-sample Mendelian randomization results for 48 T2DM-associated  
592 proteins that were significantly (P < 0.05) associated with T2DM in the two-sample MR  
593 analysis.



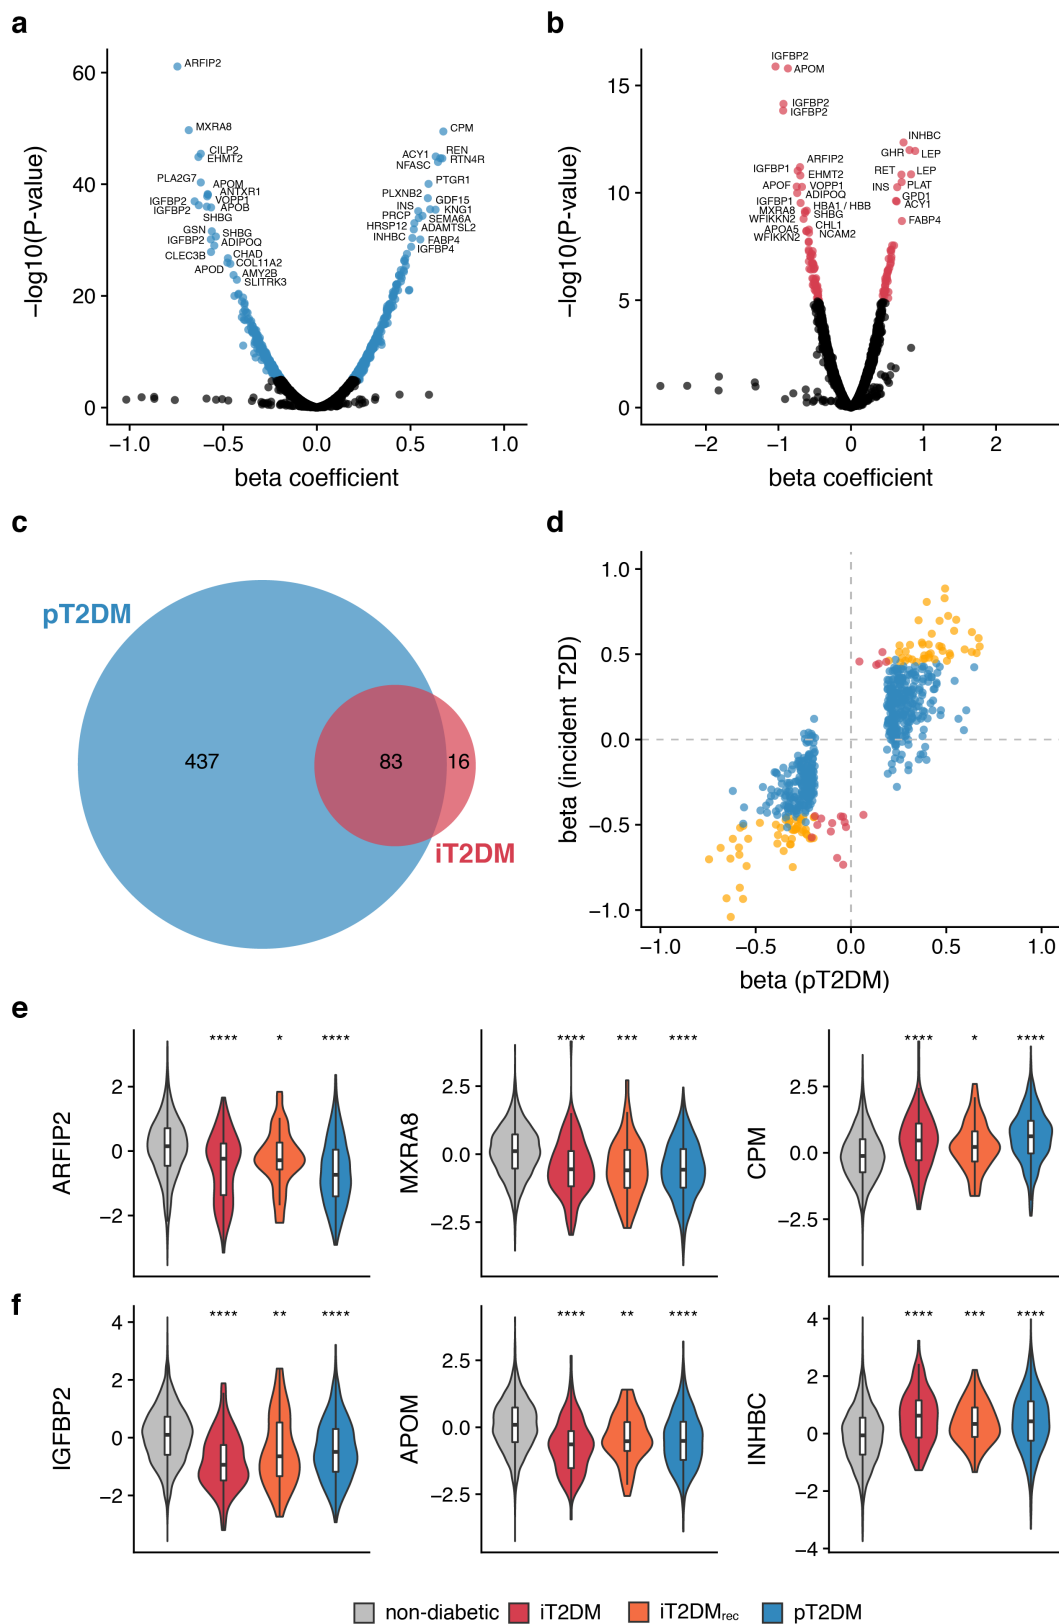

**Fig. 1** **a)** Volcano plots demonstrating serum protein (SOMAmer) associations with prevalent T2DM and **b)** incident T2DM. Points are colored where  $P_{\text{adj}} < 0.05$ . **c)** Venn diagram showing the overlap between unique proteins associated with prevalent T2DM (blue) and incident T2DM (red). **d)** Beta coefficients for associations between proteins (SOMAmers) and prevalent T2DM (x-axis) and incident T2DM (y-axis). The colors denote significant associations with prevalent T2DM (blue), incident T2DM (red) or both (yellow). **e)** Violin and boxplots showing serum protein levels across the AGES cohort stratified by T2DM status for top three proteins associated with prevalent T2DM and **f)** incident T2DM. Stars denote significant difference compared to the non-diabetic group with nominal P-values (two-sided t-test) as such: \* $P \leq 0.05$ , \*\* $P \leq 0.01$ , \*\*\* $P \leq 0.001$ , \*\*\*\* $P \leq 0.0001$ . Boxplots indicate median value, 25<sup>th</sup> and 75<sup>th</sup> percentile, whiskers extend to smallest/largest value no further than  $1.5 \times \text{IQR}$ , outliers not shown. pT2DM, prevalent T2DM; iT2DM, incident T2DM in participants with AGESII follow-up visit; iT2DM<sub>rec</sub>, incident T2DM in participants without AGESII follow-up visit.

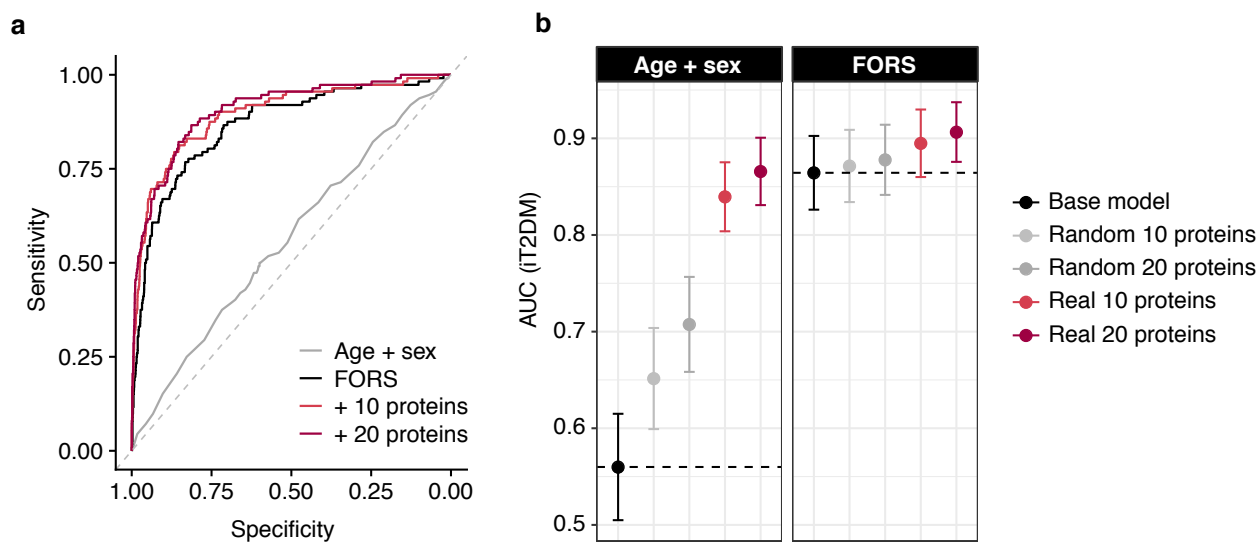

**Fig. 2 a)** ROC curves showing the added value of top 10 and 20 ranked proteins (red shades) for prediction of incident T2DM compared to age and sex (grey) and Framingham-Offspring risk score, FORS (black) in the AGES cohort ( $n = 2,940$ ,  $n_{\text{FORS}} = 2,926$ ). **b)** The AUC for top 10 and 20 proteins (red shades) is shown compared to a base model (black point and dotted line) of age and sex (left) or FORS (right) and compared to the AUC obtained by 100 permutations of randomly sampled sets of proteins (grey shades). Error bars represent 95% confidence intervals.

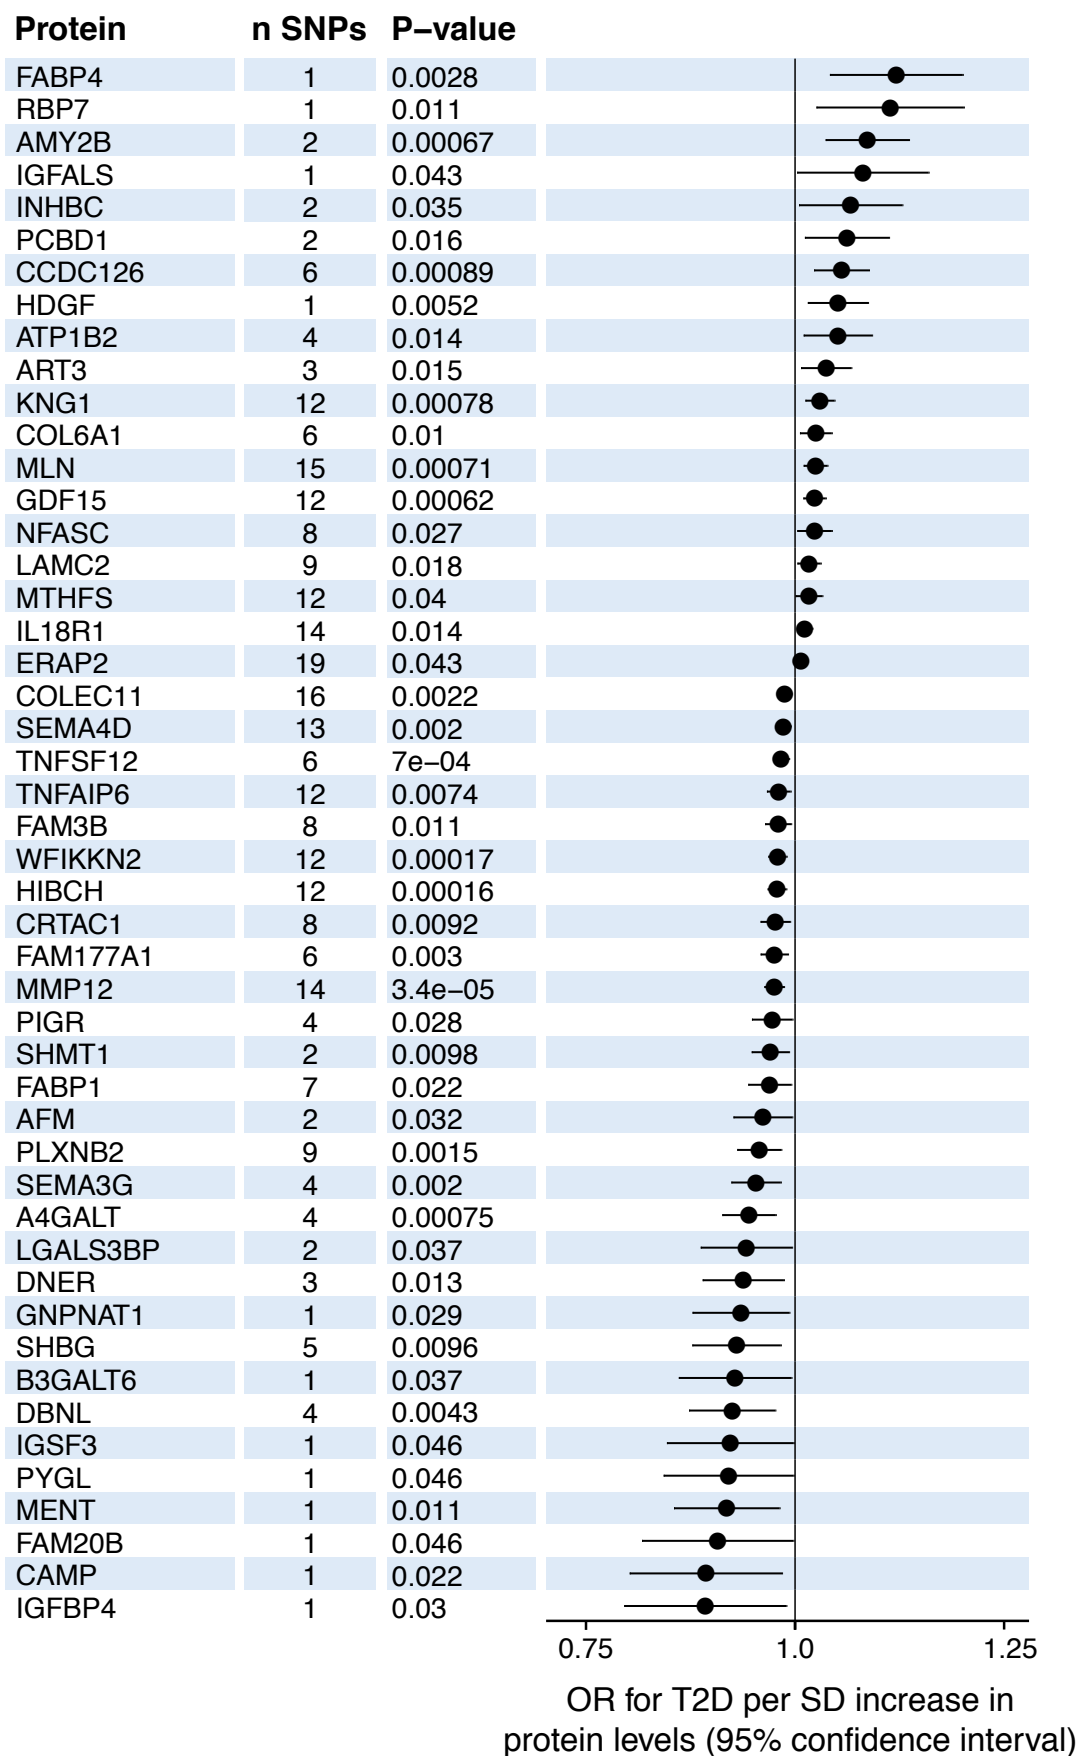

**Fig. 3** Forest plot for the 48 proteins supported as causal ( $P < 0.05$ ) in the two-sample MR analysis, together with the number of SNPs used as instruments and the MR P-value. MR estimates were obtained using the inverse variance weighted method when  $>1$  SNP was available for a given protein, but otherwise with the Wald ratio.

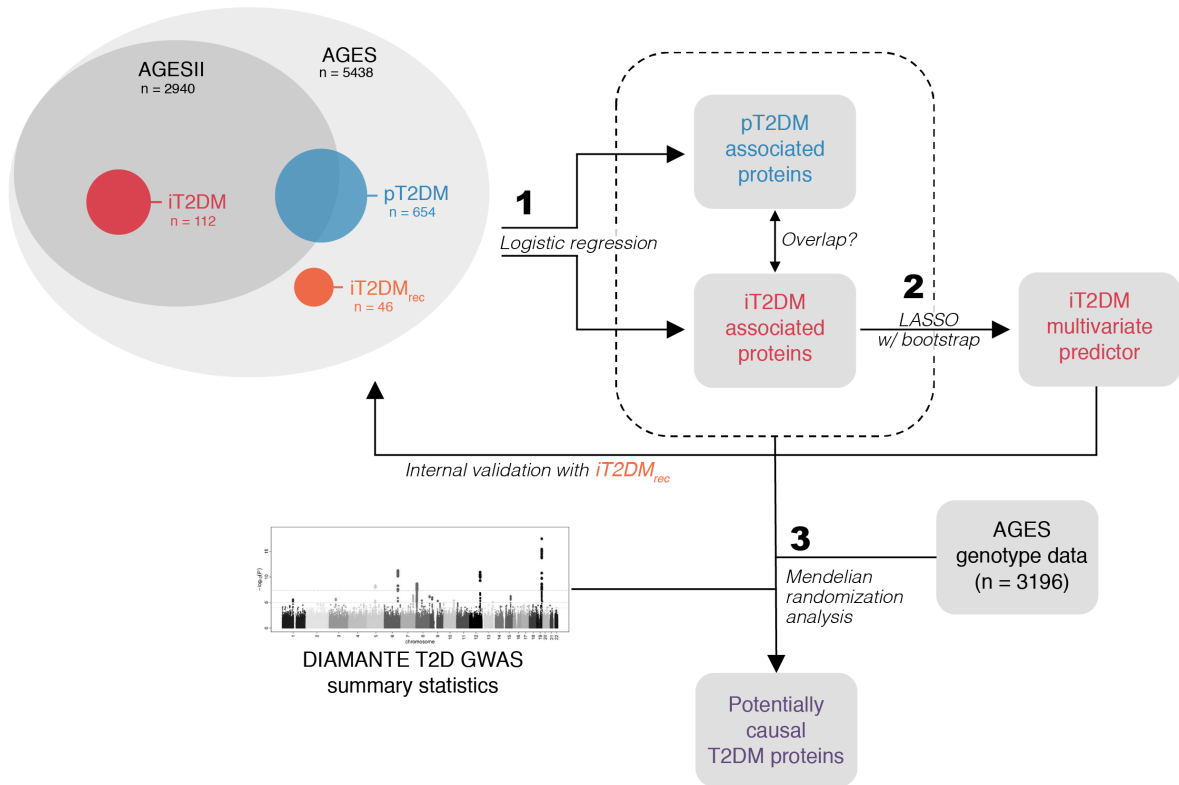

**Fig. S1** Workflow of the current study. The top left Venn diagram provides an overview of the AGES cohort, stratified by T2DM status and follow-up visit participation. The workflow is divided into three major steps; 1) identifying proteins associated with prevalent or incident T2DM using logistic regression analysis, 2) identifying a panel of proteins for multivariate prediction of incident T2DM using a LASSO bootstrap analysis, followed by internal validation using a separate part of the AGES cohort, and 3) combining genetic data from AGES and summary statistics from the DIAMANTE T2DM GWAS to screen all T2DM-associated proteins for potential causality using a Mendelian randomization analysis. pT2DM, prevalent T2DM; iT2DM, incident T2DM in participants with AGESII follow-up visit; iT2DMrec, incident T2DM in participants without AGESII follow-up visit.

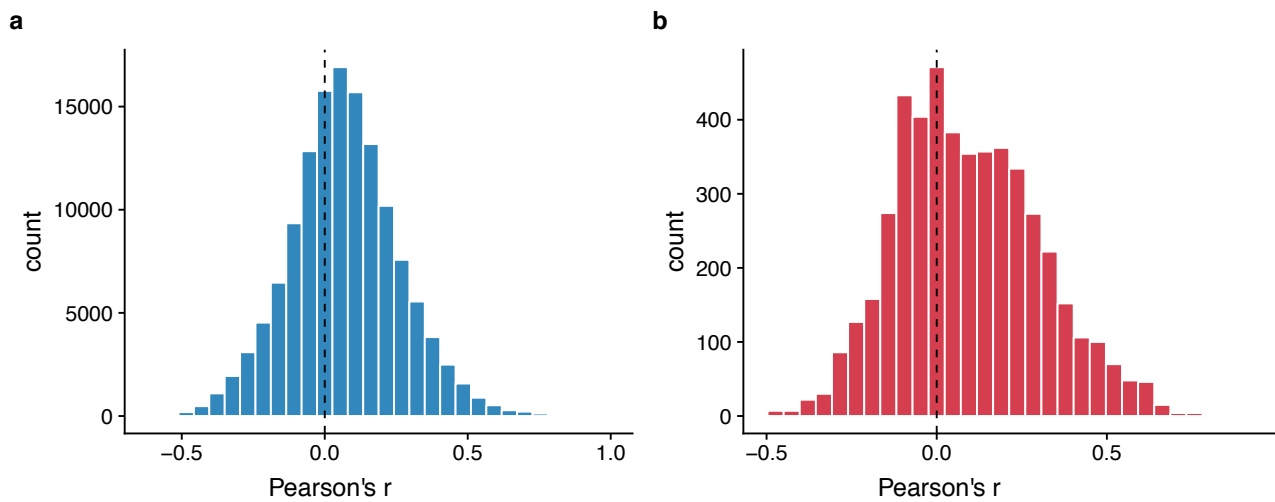

**Fig. S2** Distribution of Pearson's correlation coefficients ( $r$ ) for pairwise correlations between proteins significantly associated with **a**) prevalent T2DM and **b**) incident T2DM.

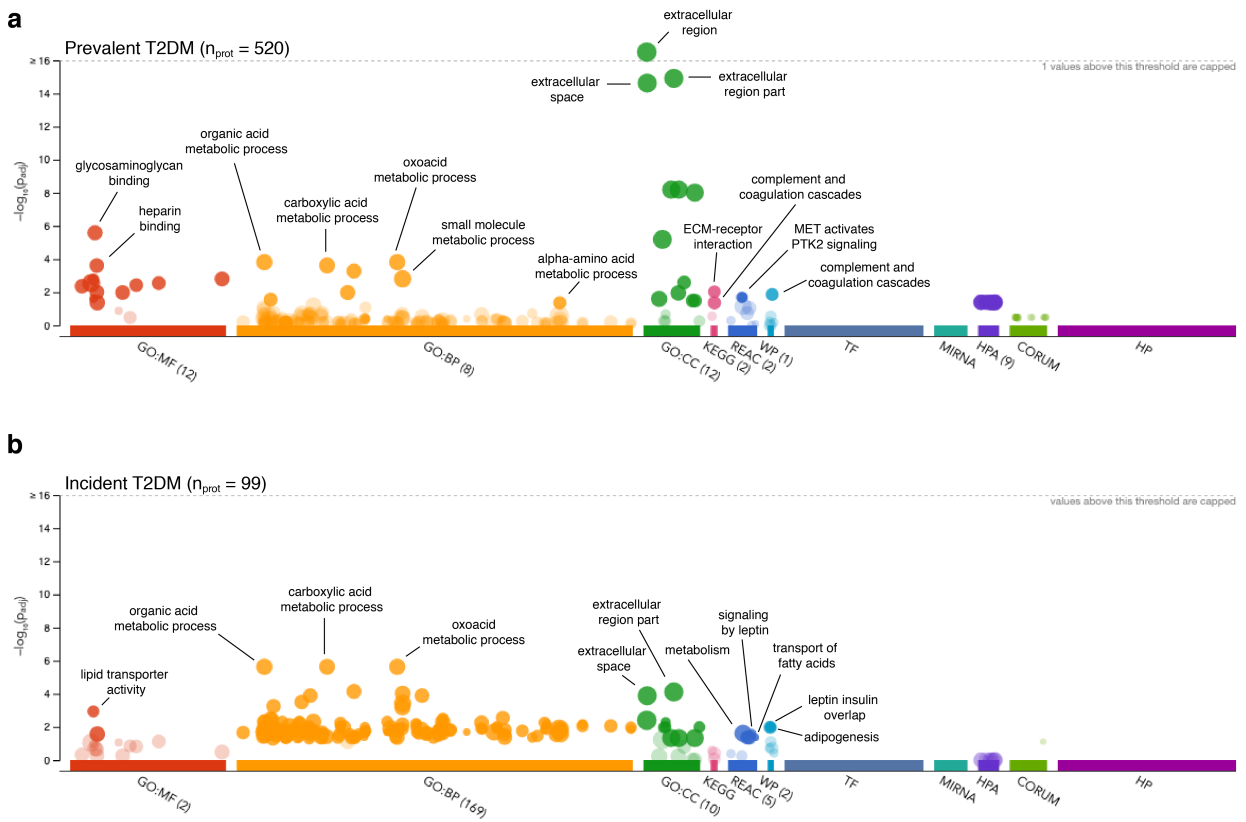

**Fig. S3** Functional enrichment results from gProfiler for **a)** 520 proteins associated with prevalent T2DM and **b)** 99 proteins associated with incident T2DM.

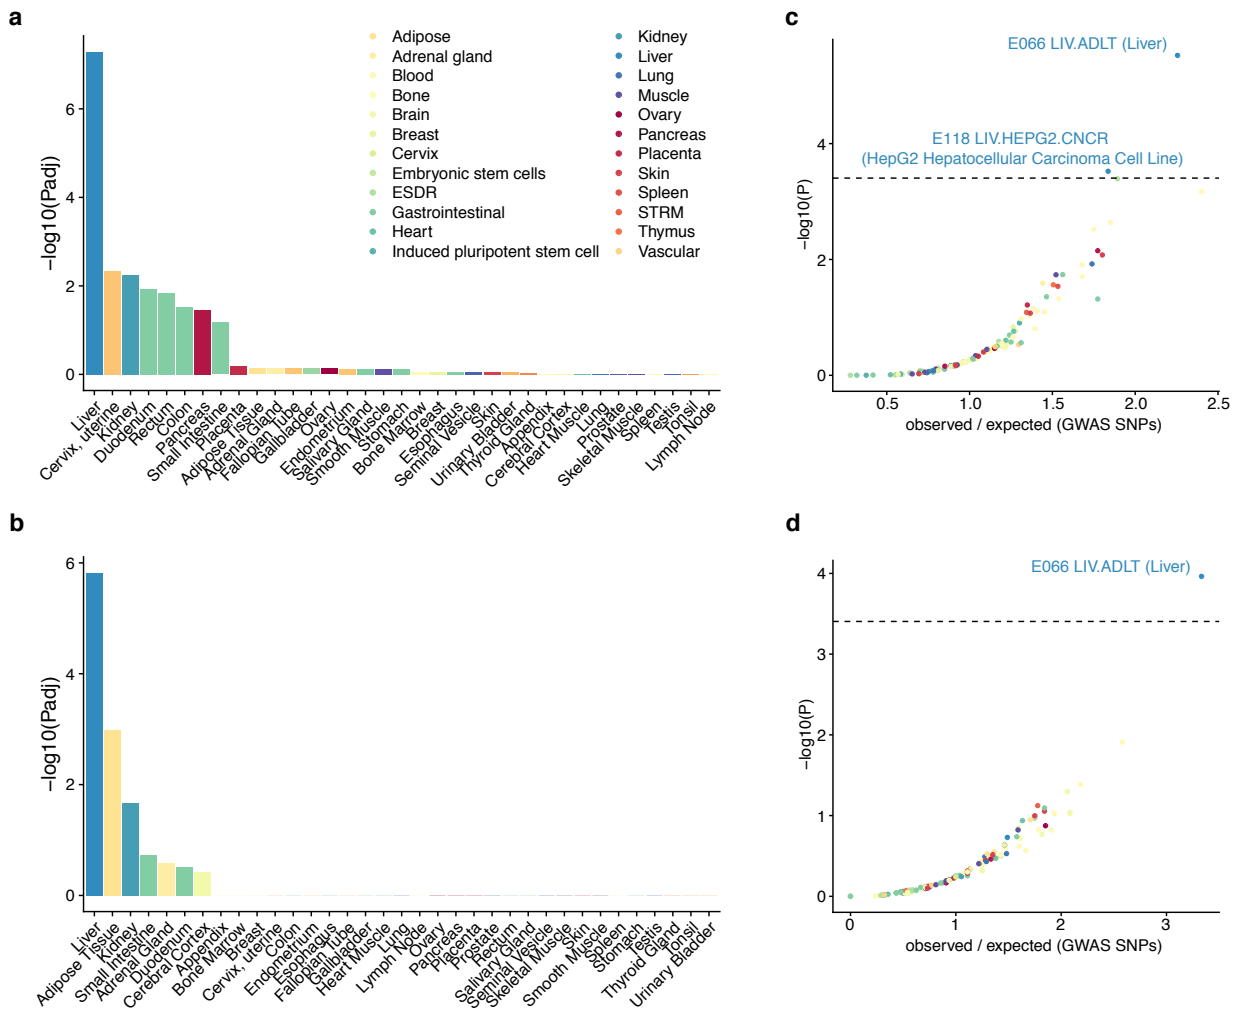

**Fig. S4** **a)** Tissue-specific gene expression enrichment for the 520 proteins associated with prevalent T2DM compared to the full panel of 4,137 proteins measured, **b)** Tissue-specific gene expression enrichment for 99 proteins associated with incident T2DM compared to the full panel of 4,137 proteins measured, **c)** Cell-type specific enhancer enrichment of genetic variants regulating levels of proteins associated with prevalent T2DM compared to GWAS SNPs, **d)** Cell-type specific enhancer element enrichment of genetic variants regulating levels of proteins associated with incident T2DM compared to GWAS SNPs.

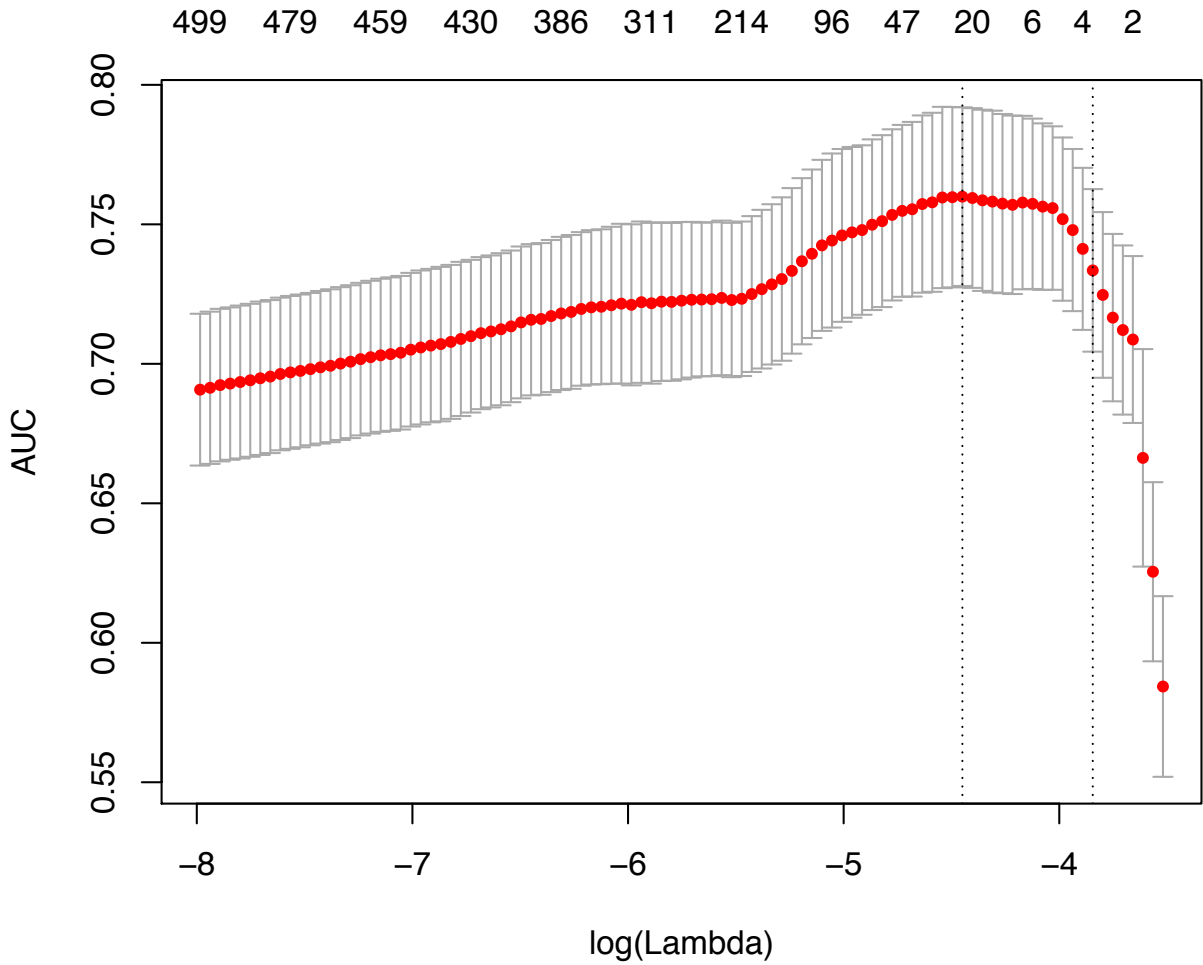

**Fig. S5** An example of a LASSO regression output for incident T2DM ( $n = 2,940$ ,  $n_{\text{case}} = 112$ ). A set of 27 non-zero parameter estimates gave the highest AUC when the tuning parameter  $\log(\lambda)$  was -4.54.



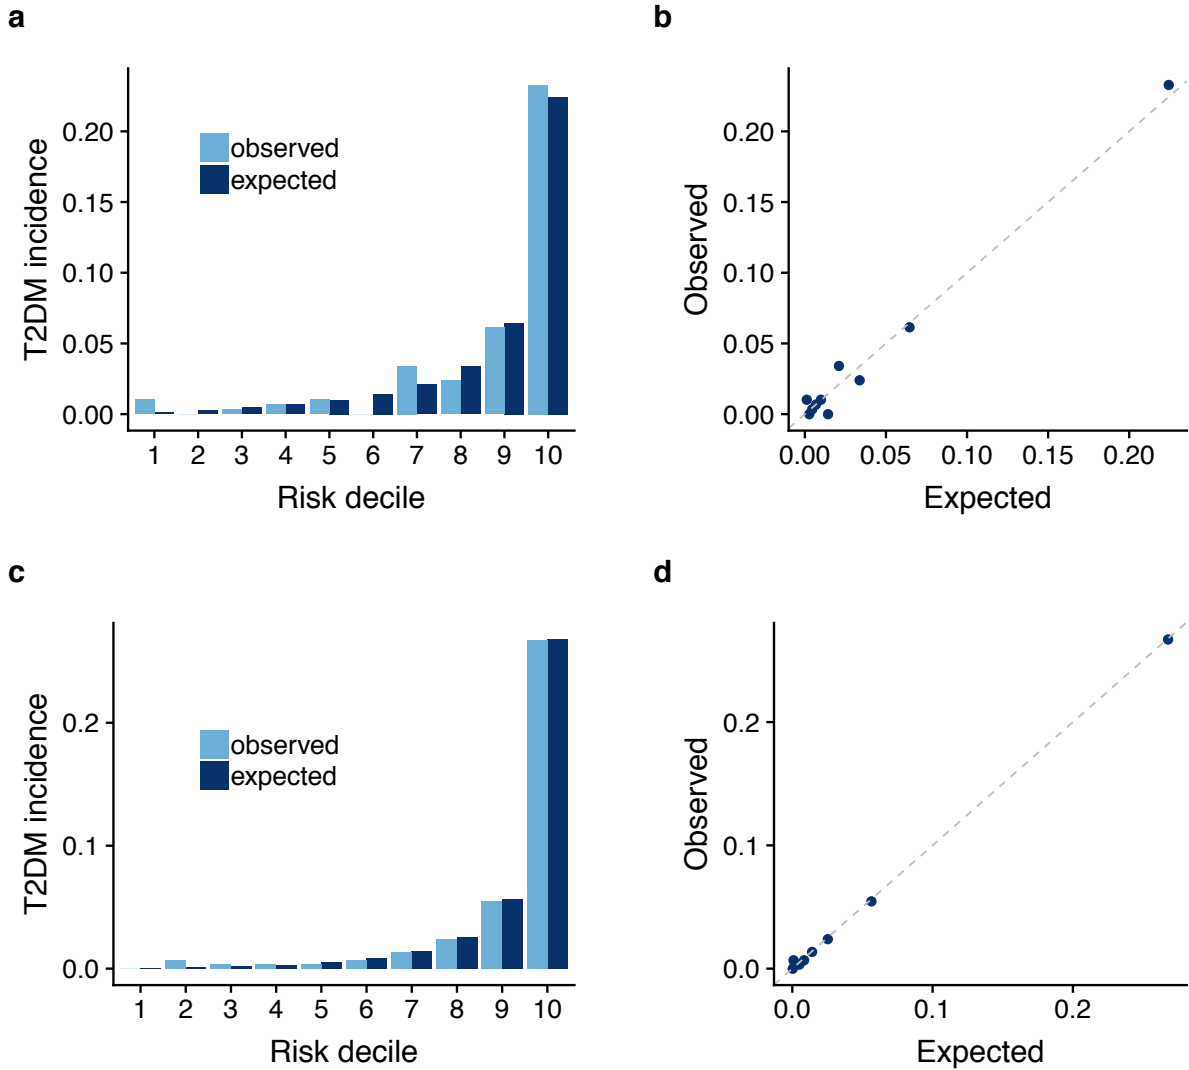

**Fig. S6** Calibration plots in the AGES sample with 5-year follow-up data ( $n = 2,940$ ,  $n_{\text{FORS}} = 2,926$ ), showing observed and predicted proportion of individuals with incident T2DM in each risk decile of the discrimination model including **a-b**) the FORS clinical model variables and **c-d**) the FORS clinical model variables plus the top 20 proteins from the LASSO analysis.

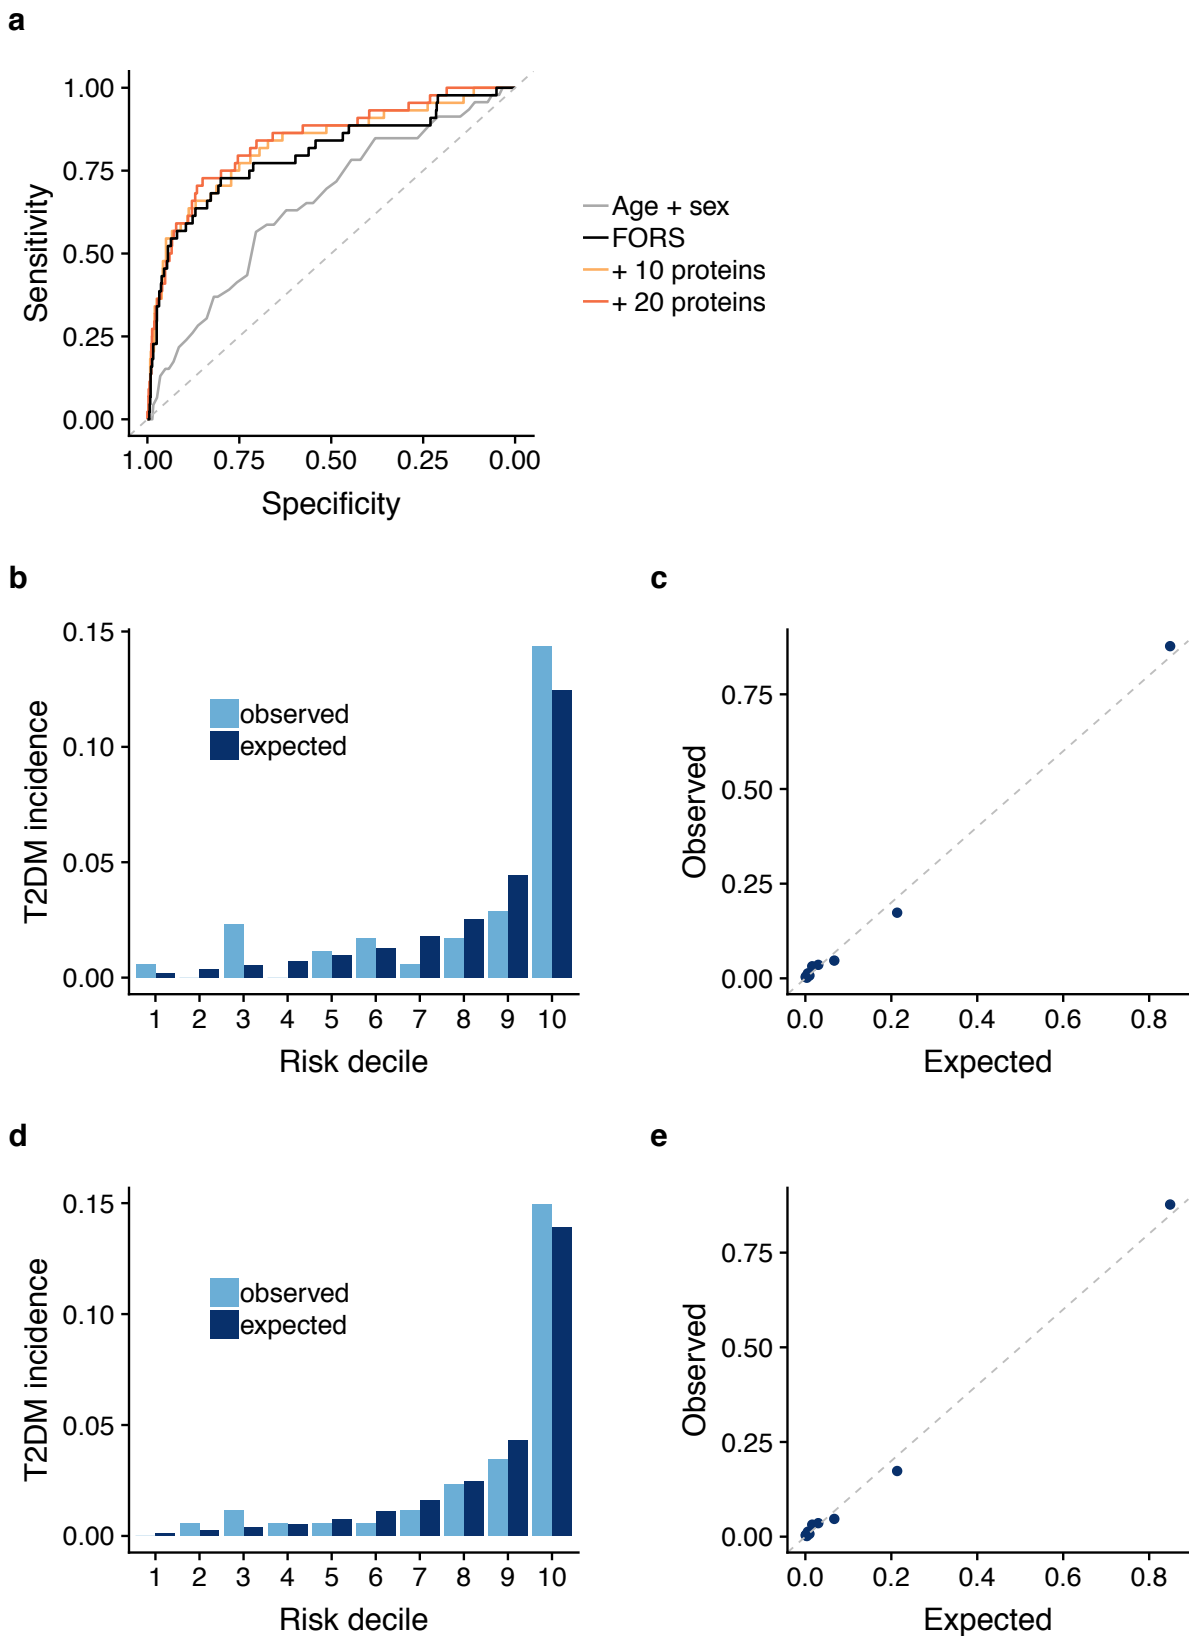

**Fig. S7 a)** ROC curves showing the added value of top 10 and 20 ranked proteins (orange shades) for prediction of incident T2DM compared to age and sex (grey) and the Framingham-Offspring risk score, FORS (black) in the AGES validation sample ( $n = 1,844$ ,  $n_{\text{FORS}} = 1,743$ ). **b-c)** Calibration plots showing observed and predicted proportion of individuals with incident T2DM in the AGES validation sample ( $n = 1,844$ ) in each risk decile of the discrimination model including the FORS clinical variables and **d-e)** the FORS clinical variables plus the 20 proteins.

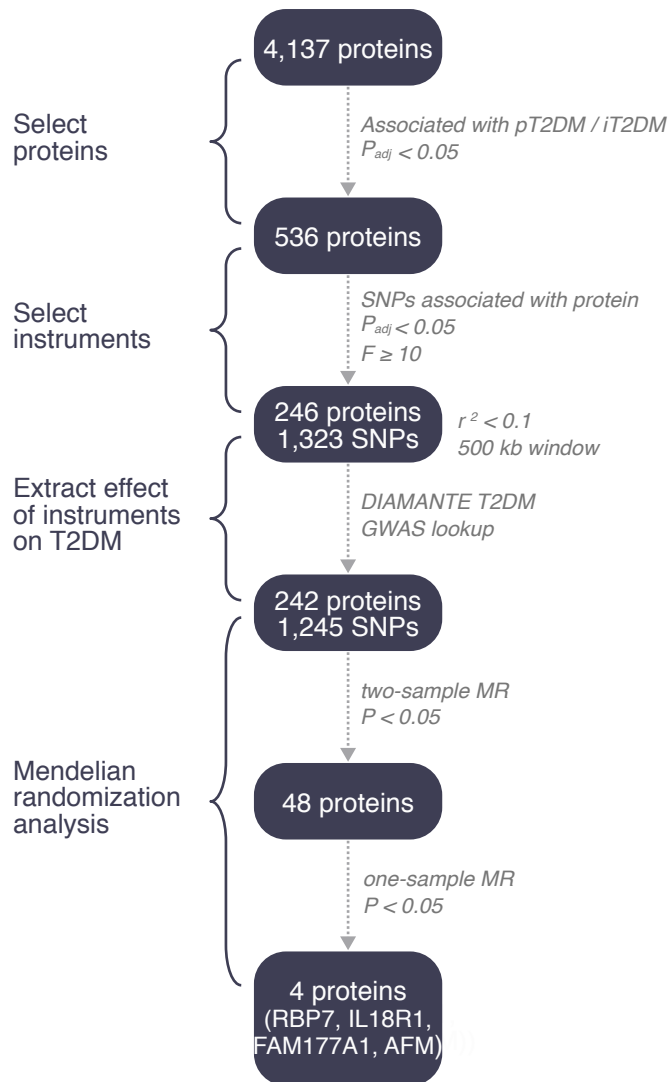

**Fig. S8** Flowchart illustrating the main steps of the Mendelian randomization analysis for proteins associated with incident or prevalent T2DM in the AGES cohort.

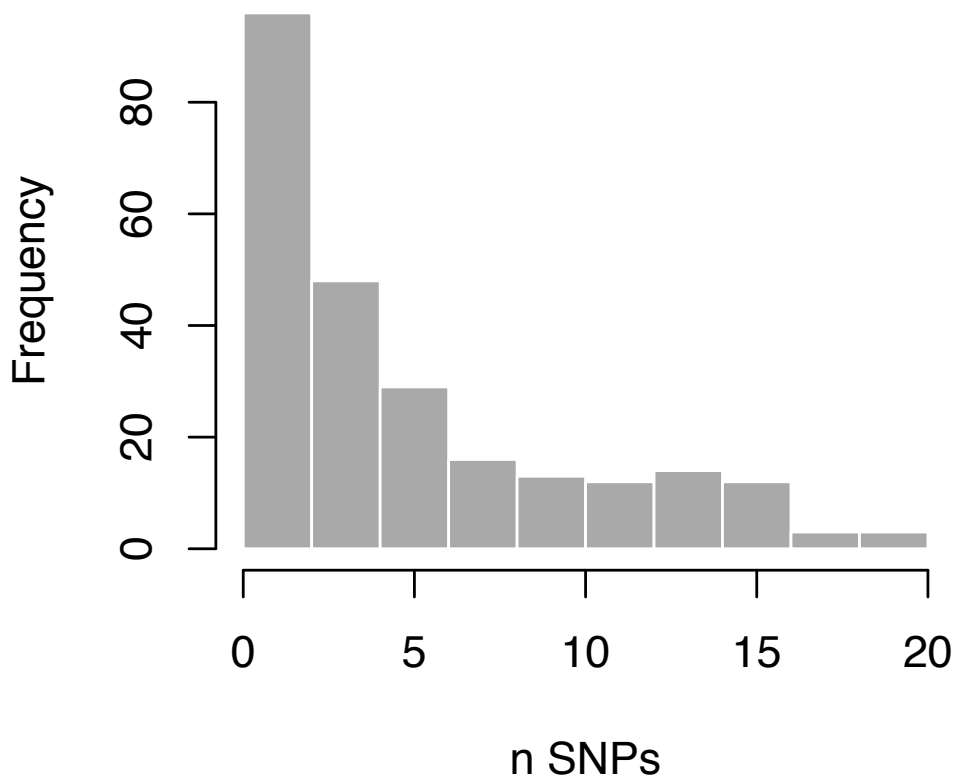

**Fig. S9** Histogram for the number of instruments identified per protein in the AGES cohort. Independent instruments were defined as genetic variants not in LD ( $r^2 < 0.1$ ) and  $>500$  kb apart.

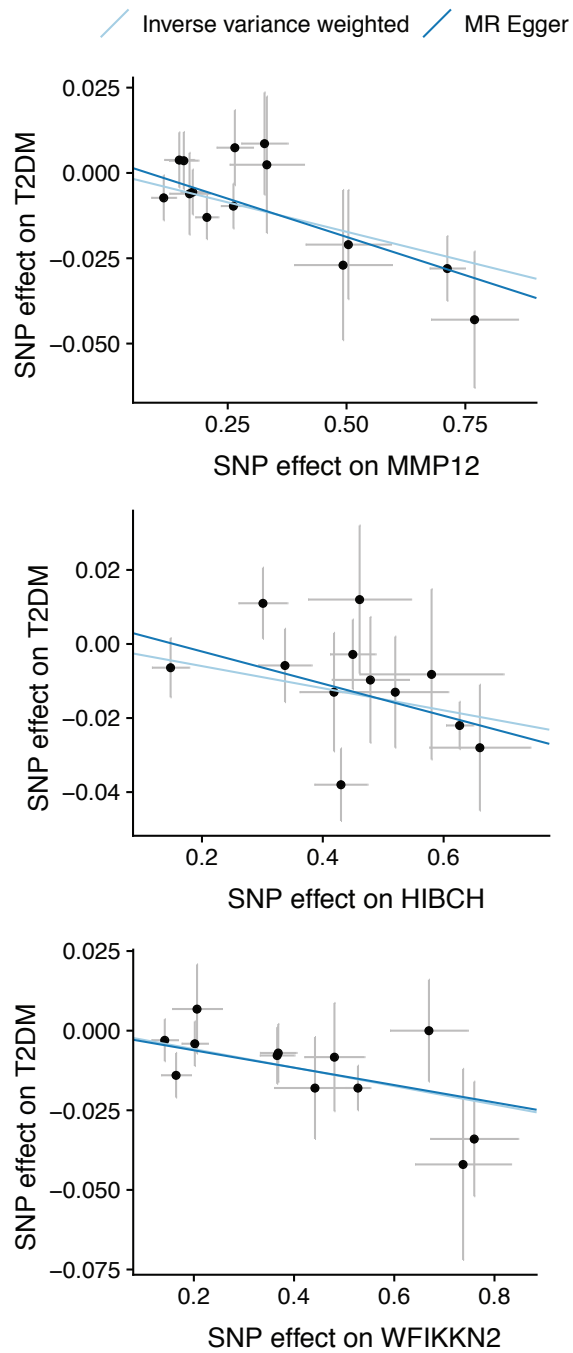

**Fig. S10** Scatterplots for the top three significant proteins in the two-sample MR, demonstrating the estimated effects (with 95% confidence intervals) of their respective genetic instruments on the protein levels in AGES (x-axis) and the risk of T2DM in the DIAMANTE GWAS (y-axis)

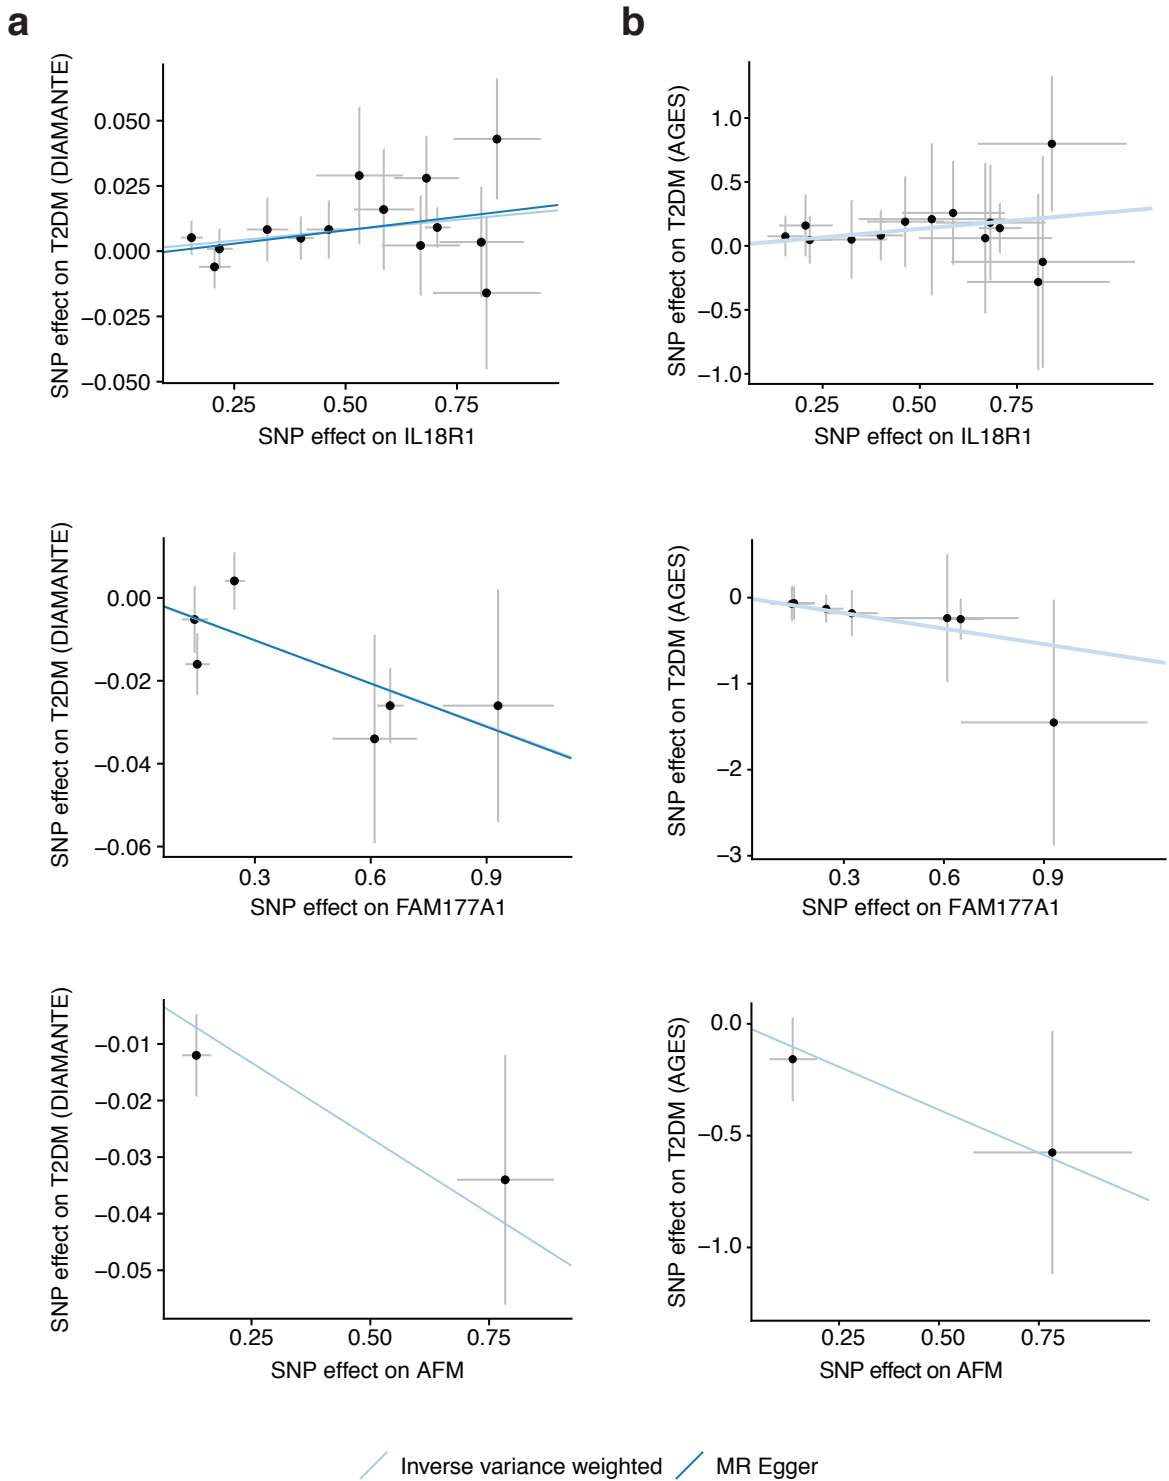

**Fig. S11** Scatterplots for the three proteins with  $P < 0.05$  and directionally consistent in both the two- and one- sample MR analyses and more than one genetic instrument, demonstrating the estimated effects (with 95% confidence intervals) of their respective genetic instruments on the protein levels in AGES (x-axis) and the risk of T2DM in **a**) the DIAMANTE GWAS (y-axis) and **b**) in the AGES cohort.

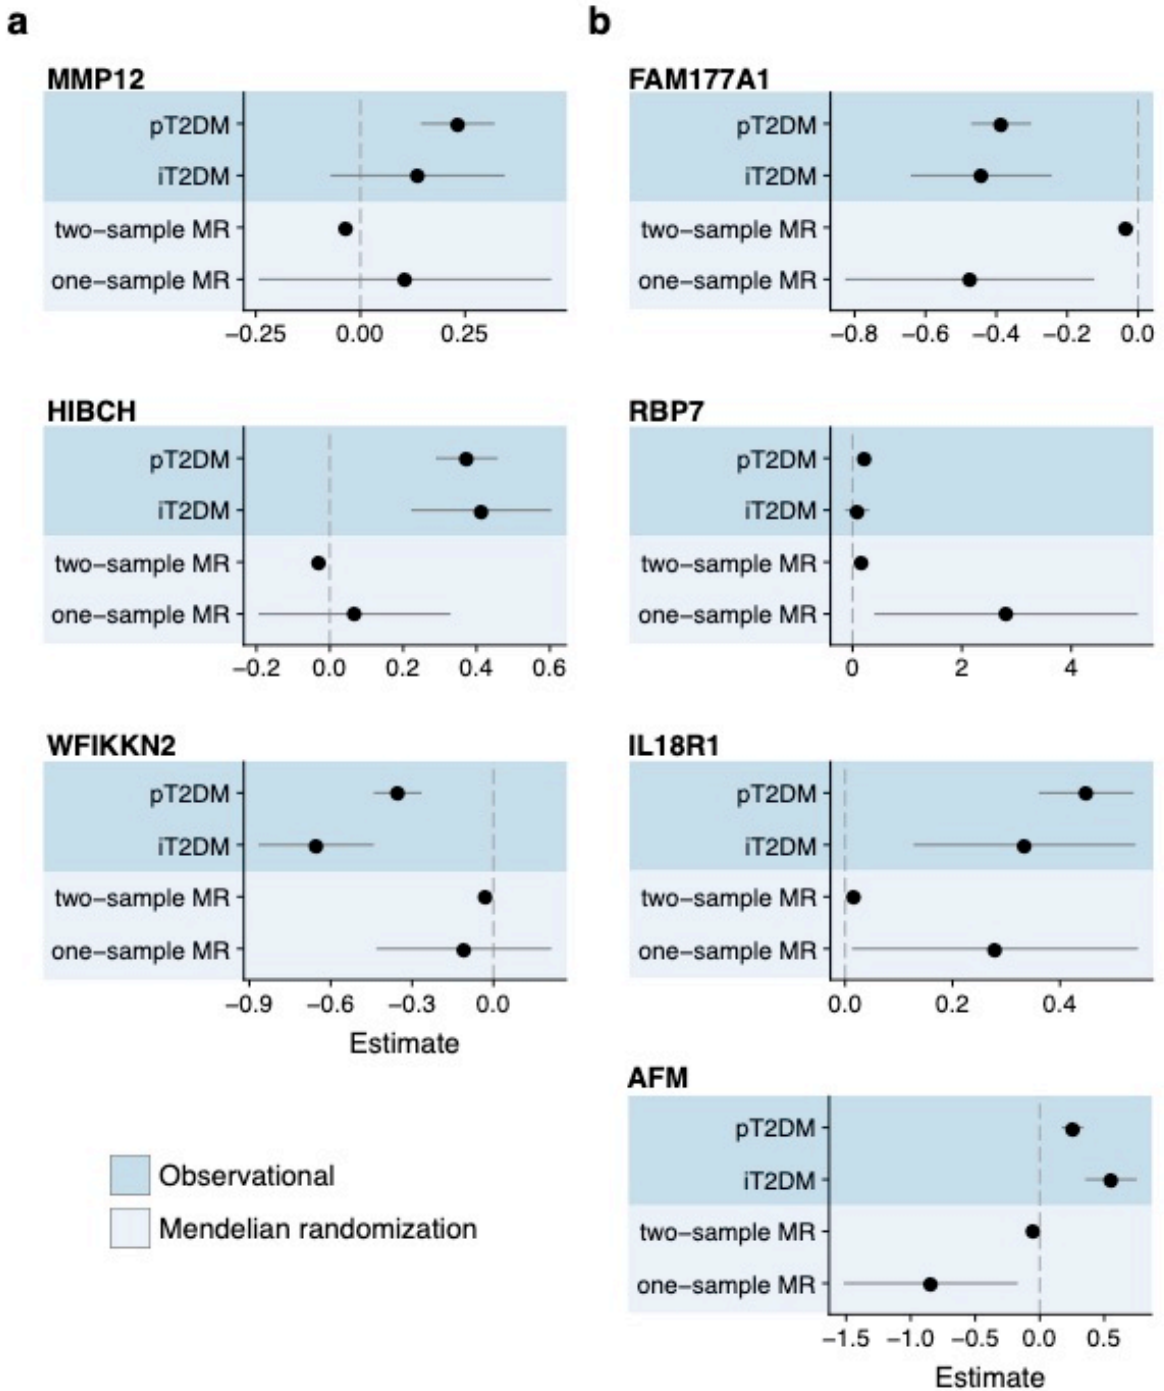

**Fig. S12** Forest plots comparing observational estimates (darker blue) for incident and prevalent T2DM, and MR estimates (lighter blue) for T2DM in two- and one-sample MR analyses for **a)** the top three significant proteins in the two-sample MR analysis and **b)** the four proteins with  $P < 0.05$  and directionally consistent in both two- and one-sample MR analyses. Error bars represent 95% confidence intervals.

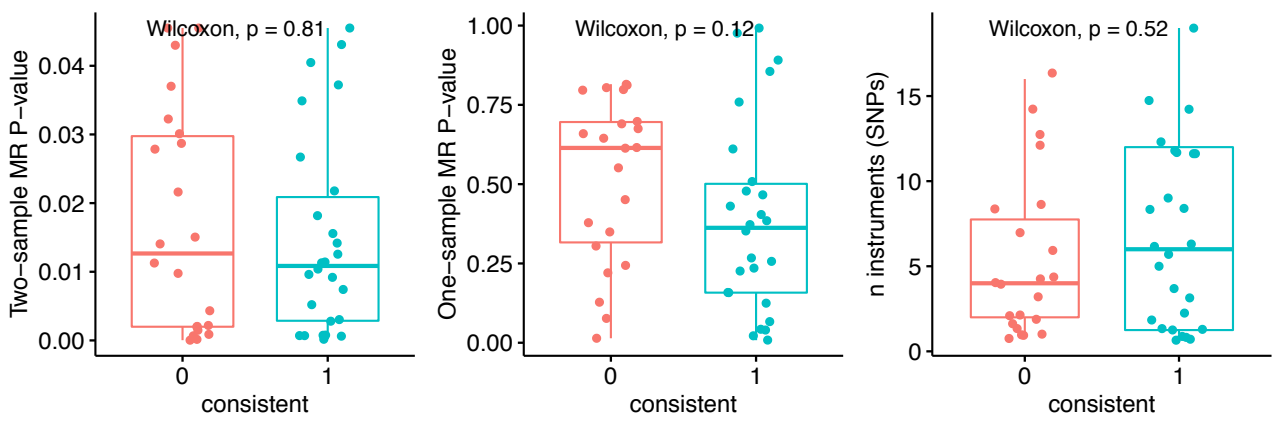

**Fig. S13** Comparison of MR P-values (two- and one-sample) and number of instruments by directional consistency between observational estimate for prevalent T2DM and two-sample MR.
